# Supplementary material for: Impact of COVID-19 on female fertility: a systematic review and meta-analysis protocol
Source: PubMed Central journal article supplement — BMJ Open. 2021 Feb 25;11(2):e045524. doi: 10.1136/bmjopen-2020-045524 (PMC7908052; doi:10.1136/bmjopen-2020-045524), 2021-02-25
Supplement: bmjopen-2020-045524.draft_revisions.pdf [file bmjopen-2020-045524.draft_revisions.pdf]

# BMJ Open

BMJ Open is committed to open peer review. As part of this commitment we make the peer review history of every article we publish publicly available.

When an article is published we post the peer reviewers' comments and the authors' responses online. We also post the versions of the paper that were used during peer review. These are the versions that the peer review comments apply to.

The versions of the paper that follow are the versions that were submitted during the peer review process. They are not the versions of record or the final published versions. They should not be cited or distributed as the published version of this manuscript.

BMJ Open is an open access journal and the full, final, typeset and author-corrected version of record of the manuscript is available on our site with no access controls, subscription charges or pay-per-view fees (<http://bmjopen.bmj.com>).

If you have any questions on BMJ Open's open peer review process please email [info.bmjopen@bmj.com](mailto:info.bmjopen@bmj.com)

# BMJ Open

## The impact of COVID-19 on female fertility: a systematic review and meta-analysis protocol

|                               |                                                                                                                                                                                                                                                                                                                                                                                                                                                                                                                                                                                                                                                                                                                                                                                                                                                                                                                                                                                                                                                                                           |
|-------------------------------|-------------------------------------------------------------------------------------------------------------------------------------------------------------------------------------------------------------------------------------------------------------------------------------------------------------------------------------------------------------------------------------------------------------------------------------------------------------------------------------------------------------------------------------------------------------------------------------------------------------------------------------------------------------------------------------------------------------------------------------------------------------------------------------------------------------------------------------------------------------------------------------------------------------------------------------------------------------------------------------------------------------------------------------------------------------------------------------------|
| Journal:                      | <i>BMJ Open</i>                                                                                                                                                                                                                                                                                                                                                                                                                                                                                                                                                                                                                                                                                                                                                                                                                                                                                                                                                                                                                                                                           |
| Manuscript ID                 | bmjopen-2020-045524                                                                                                                                                                                                                                                                                                                                                                                                                                                                                                                                                                                                                                                                                                                                                                                                                                                                                                                                                                                                                                                                       |
| Article Type:                 | Protocol                                                                                                                                                                                                                                                                                                                                                                                                                                                                                                                                                                                                                                                                                                                                                                                                                                                                                                                                                                                                                                                                                  |
| Date Submitted by the Author: | 04-Oct-2020                                                                                                                                                                                                                                                                                                                                                                                                                                                                                                                                                                                                                                                                                                                                                                                                                                                                                                                                                                                                                                                                               |
| Complete List of Authors:     | Li, Fangyuan; Chengdu University of Traditional Chinese Medicine Affiliated Hospital; Chengdu University of Traditional Chinese Medicine, Lu, Hua; Chengdu University of Traditional Chinese Medicine Affiliated Hospital; Chengdu University of Traditional Chinese Medicine, Zhang, Qi ; Chengdu University of Traditional Chinese Medicine Affiliated Hospital; Chengdu University of Traditional Chinese Medicine, Li, Xinyun ; Chengdu University of Traditional Chinese Medicine Affiliated Hospital; Chengdu University of Traditional Chinese Medicine, wang, Tong; Chengdu University of Traditional Chinese Medicine Affiliated Hospital; Chengdu University of Traditional Chinese Medicine, Liu, Qianchen; Chengdu University of Traditional Chinese Medicine Affiliated Hospital<br>Yang, Qian; Chengdu University of Traditional Chinese Medicine, ; Chengdu University of Traditional Chinese Medicine Affiliated Hospital<br>Qiang, Lingxia; Chengdu University of Traditional Chinese Medicine, ; Chengdu University of Traditional Chinese Medicine Affiliated Hospital |
| Keywords:                     | COVID-19, GYNAECOLOGY, Epidemiology < INFECTIOUS DISEASES                                                                                                                                                                                                                                                                                                                                                                                                                                                                                                                                                                                                                                                                                                                                                                                                                                                                                                                                                                                                                                 |
|                               |                                                                                                                                                                                                                                                                                                                                                                                                                                                                                                                                                                                                                                                                                                                                                                                                                                                                                                                                                                                                                                                                                           |

SCHOLARONE™  
Manuscripts

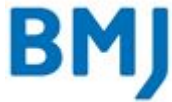

I, the Submitting Author has the right to grant and does grant on behalf of all authors of the Work (as defined in the below author licence), an exclusive licence and/or a non-exclusive licence for contributions from authors who are: i) UK Crown employees; ii) where BMJ has agreed a CC-BY licence shall apply, and/or iii) in accordance with the terms applicable for US Federal Government officers or employees acting as part of their official duties; on a worldwide, perpetual, irrevocable, royalty-free basis to BMJ Publishing Group Ltd ("BMJ") its licensees and where the relevant Journal is co-owned by BMJ to the co-owners of the Journal, to publish the Work in this journal and any other BMJ products and to exploit all rights, as set out in our [licence](#).

The Submitting Author accepts and understands that any supply made under these terms is made by BMJ to the Submitting Author unless you are acting as an employee on behalf of your employer or a postgraduate student of an affiliated institution which is paying any applicable article publishing charge ("APC") for Open Access articles. Where the Submitting Author wishes to make the Work available on an Open Access basis (and intends to pay the relevant APC), the terms of reuse of such Open Access shall be governed by a Creative Commons licence – details of these licences and which [Creative Commons](#) licence will apply to this Work are set out in our licence referred to above.

Other than as permitted in any relevant BMJ Author's Self Archiving Policies, I confirm this Work has not been accepted for publication elsewhere, is not being considered for publication elsewhere and does not duplicate material already published. I confirm all authors consent to publication of this Work and authorise the granting of this licence.

# The impact of COVID-19 on female fertility: a systematic review and meta-analysis protocol

Fangyuan Li,<sup>a,b</sup> Hua Lu,<sup>a,b,\*</sup> Qi Zhang,<sup>a,b</sup> Xinyun Li,<sup>a,b</sup> Tongwang,<sup>a,b</sup> Qianchen Liu,<sup>b</sup>

QianYang,<sup>a,b</sup> Lingxia Qiang<sup>a,b</sup>

**Corresponding author:** Prof. Hua Lu

\* Chengdu University of Traditional Chinese Medicine Affiliated Hospital, NO.39 Shi-er-qiao Road, Chengdu 610075, Sichuan Province, P.R. China.

E-mail: lh18980880525@126.com

Tel: (086) 18980880525

## Author information

<sup>a</sup> College of Clinical Medicine, Chengdu University of Traditional Chinese Medicine, NO.37 Shi-er-qiao Road, Chengdu 610075, Sichuan Province, P.R. China;

<sup>b</sup> Chengdu University of Traditional Chinese Medicine Affiliated Hospital, NO.39 Shi-er-qiao Road, Chengdu 610075, Sichuan Province, P.R. China;

## Contributor's email

Fangyuan Li, Email: lfy3348377873@126.com.

Qi Zhang, Email: zhangqi9212@163.com.

Xinyun Li, Email: lixy9405@outlook.com.

TongWang, Email: wangtongde0623@163.com.

Qianchen Liu, Email: vinalqc@126.com.

QianYang, Email: 997650457@qq.com.

Lingxia Qiang, Email: 1499293001@qq.com.

1  
2  
3  
4  
5  
6  
7  
8  
9  
10  
11  
12  
13  
14  
15  
16  
17  
18  
19  
20  
21  
22  
23  
24  
25  
26  
27  
28  
29  
30  
31  
32  
33  
34  
35  
36  
37  
38  
39  
40  
41  
42  
43  
44  
45  
46  
47  
48  
49  
50  
51  
52  
53  
54  
55  
56  
57  
58  
59  
60

**Subject Terms:** 2019 novel coronavirus disease, COVID-19, female fertility.

**Word Count:** 3,117 words

For peer review only

## ABSTRACT

### Introduction

The increased social and economic burdens for COVID-19 outbreaks and epidemics make the prevention of such secondary injuries a major public health goal. The novel coronavirus invades the target cell by binding to ACE2 which is widely expressed in the ovaries, uterus, vagina, and placenta. SARS-CoV-2 might disturb the female fertility through regulating ACE2. However, there is no systematic and comprehensive evidence on the association of COVID-19 with female fertility. It is essential to investigate whether COVID-19 hurts female fertility and to early prevention and intervention of its secondary effects.

### Methods and analysis

We will systematically search cohort studies, cross-sectional studies, case-control studies, self-controlled case series designs, and randomized controlled trials (if available) in the following databases: Web of Science, PubMed, EMBASE, Cochrane Library, Ovid, EBSCO, WHO COVID-19 database, CBM, CNKI, VIP, and WangFang database. Medical subject headings and free text terms for “COVID-19” AND “female” AND “fertility” will be performed. Eligibility criteria are as follows: population—female patients, aged 13-49 years; exposure—infection with SARS-CoV-2; comparison—population without SARS-CoV-2 infections or latent SARS-CoV-2 infections; and outcome—female fertility, such as ovarian reserve function, uterine receptivity, oviducts status, and menstruation status. Article screening and data extraction will be undertaken independently by two reviewers, and discrepancies will be resolved through discussion. We will use the  $I^2$  statistics to assess the heterogeneity and perform a meta-analysis when sufficiently homogeneous studies are provided. Otherwise, a narrative synthesis will be performed. We will explore the potential sources of heterogeneity using subgroup analyses and meta-regression.

### Ethics and dissemination

Formal ethical approval is not required, and findings will be published in a peer-reviewed journal.

### PROSPERO registration number

CRD42020189856

**Keywords:** novel coronavirus, COVID-19, female fertility, systematic review

### Strengths and limitations of this study

This systematic review will first synthesize the available evidence on the association between COVID-19 and female fertility and will fill in the literature gaps.

The current network meta-analysis results provide more substantial evidence for fertility protection decisions in the female with COVID-19.

A potential limitation may be that relevant papers may have been omitted despite extensive searches.

## INTRODUCTION

The national and global spread of 2019 Novel Coronavirus (2019-nCoV), which is caused by severe acute respiratory syndrome (SARS) coronavirus 2 (SARS-CoV-2), has made it one of the most severe public health threat. Globally, as of 2 September 2020, 25,602,665 confirmed cases of COVID-19, including 852,758 deaths, were reported to WHO<sup>1</sup>. SARS-CoV-2 infection disrupts normal immune responses<sup>2</sup>, leading to tissue damage locally and systemically<sup>3</sup>. Local tissue damage mainly affects the lower respiratory tract and presents as pneumonia, including fever, cough, expectoration, haemoptysis, etc<sup>4</sup>. The extrapulmonary damage of COVID-19 includes acute kidney injury, hepatocellular injury, neurologic illnesses, myocardial dysfunction and arrhythmia, and gastrointestinal symptoms<sup>5</sup>. Besides, Sperm are also susceptible to viral attack<sup>6</sup> and SARS-CoV-2 infection may most likely to cause male infertility<sup>7</sup>. Some studies have shown that SARS-CoV-2 might affect female fertility and disturb female reproductive functions<sup>8,9</sup>. However, the association between COVID-19 and female fertility has not been systematically evaluated.

COVID-19 appears to have shown negative effects on the reproductive system. The scale of the COVID-19 pandemic, there appears to be a potential decline in fertility<sup>10</sup>. A study showed that many young people have a wide range of problems affecting their sexual and reproductive health due to COVID-19 pandemic and related containment measures<sup>11</sup>. An epidemiological study demonstrated that coronaviruses could have adverse effects on fetuses and infants, including preterm delivery, intrauterine growth restriction, spontaneous abortion, and death<sup>12</sup>. Moreover, studies have documented the presence of SARS-COV-2 virus across the placenta even in pregnant patients with mild COVID-19 disease, potentially leading to fetal growth restriction and other pregnancy complications<sup>13</sup>. Accumulating evidence now suggests that 2019-nCoV/ACE2 may interfere with the female reproductive functions, leading to menstrual disorder,

1  
2  
3 infertility, and fetal distress<sup>8</sup>.

4  
5 Angiotensin-converting enzyme (ACE) 2 is a receptor for severe acute respiratory syndrome (SARS)-CoV<sup>14</sup>.  
6  
7 SARS-CoV-2, as a subgenus Sarbecovirus of the genus Betacoronavirus, shares 76% amino acid sequence  
8  
9 homology with SARS-CoV<sup>15</sup>. The protein expression profile of ACE2 is also considered to be the host  
10  
11 receptor of SARS-COV-2<sup>16</sup>. Thus SARS-CoV-2 can invade target host cells by using the ACE2 as the  
12  
13 primary receptor binding site<sup>17-19</sup> and regulate the expression of ACE2 in host cells<sup>8</sup>. ACE2 expression has  
14  
15 been assessed in various human organs, such as respiratory tracts, heart, kidney, ovary, uterus, testis, vagina  
16  
17 and placenta, and gastrointestinal system<sup>8-20</sup>. Notably, ACE2 is highly expressed in the ovaries<sup>21</sup>. The  
18  
19 available evidence suggests that ACE2 is expressed in stromal cells, granulosa cells, and oocytes in  
20  
21 immature rat ovaries<sup>22</sup>. ACE2 regulates follicular development and ovulation, regulates luteal angiogenesis  
22  
23 and degeneration, and affects the regular changes of endometrial tissue and embryo development<sup>8</sup>. ACE2  
24  
25 plays a regulatory role in reproduction<sup>7</sup>. Taking these factors into account, Sars-cov-2 may disturb female  
26  
27 fertility by attacking ovarian tissue and granulosa cells or by damaging endometrial epithelial cells<sup>9</sup>. In  
28  
29 addition, COVID-19, as an impaired immune system and uncontrolled inflammatory responses severe  
30  
31 disease, may alter the function of the hypothalamic-pituitary-gonadal axis<sup>2-23</sup>. Sex steroids are potent  
32  
33 immune-modulators, different concentrations of progesterone (P) <sup>4</sup> and androgen are likely to influence the  
34  
35 immune response and inflammatory outcomes of COVID-19<sup>23</sup>. However, the magnitude of the association  
36  
37 between COVID-19 and female fertility remains less clear.

38  
39 With the overwhelming magnitude of COVID-19 and its worldwide prevalence, the associated health burden,  
40  
41 as well as social and economic costs, might be a massive loss around the world. To our knowledge, there is  
42  
43 no systematic review of the potential role of COVID-19 in female fertility.  
44  
45 One of the most critical questions that remain to be answered is whether or how the COVID-19 will affect  
46  
47 female fertility. Therefore, we will perform a systematic review and meta-analysis to increase our  
48  
49 understanding of the relationship between COVID-19 and female fertility and to facilitate the development  
50  
51 of prevention strategies at the individual and population levels.

## 52 53 **METHODS AND ANALYSIS**

54  
55 This study will be reported based on the Preferred Reporting Items for Systematic Reviews and  
56  
57 Meta-Analyses Protocol (PRISMA-P) statement<sup>24</sup> and meta-analysis of Observational Studies in  
58  
59



1  
2  
3 Epidemiology (MOOSE)<sup>25</sup>. The protocol for this review is registered in the International Prospective  
4 Register of Systematic Reviews (PROSPERO), registration number (CRD42020189856).  
5  
6  
7

## 8 **Inclusion/exclusion criteria for study selection**

9

### 10 **Study designs and characteristics**

11

12  
13 We will include observational studies (cohort studies, cross-sectional studies, and case-control studies),  
14 self-controlled case series designs, and randomised controlled trials if available. These studies should  
15 also report the impact of COVID-19 on female fertility, including variations in menstrual situation, gonad  
16 function, ovarian reserve function, tubal patency, endometrial receptivity, and other  
17 potential of reproduction. It is not restricted by language, publication status, geography, or medical  
18 conditions.  
19  
20  
21  
22  
23  
24

### 25 **Participants**

26

27 Female patients in puberty and adulthood (13 years old  $\leq$  age  $\leq$  49 years old) with COVID-19; Participants  
28 were not excessively exposed to certain physical, biological, chemical, or environmental factors that affect  
29 female fertility, such as lead, cadmium, mercury, pesticides, benzene, toluene and ionizing radiation<sup>26</sup>; not  
30 have any gonadal injury that caused by high-dose alkylating agent chemotherapy and abdominal/pelvic  
31 radiotherapy<sup>27</sup>; and severe thyroid dysfunction and other diseases that affect female fertility will be  
32 excluded<sup>28</sup>.  
33  
34  
35  
36  
37  
38

### 39 **Exposure/Interest**

40

41  
42 The exposure factor of interest is infection with SARS-CoV-2, which is mainly diagnosed by RT-PCR with  
43 nasal swab, tracheal aspirate, or bronchoalveolar lavage (BAL) specimens<sup>29</sup>.  
44  
45  
46

### 47 **Comparators**

48

49 The comparator group will be population that without SARS-CoV-2 infections or with latent SARS-CoV-2  
50 infections.  
51

### 52 **Outcome measures**

53

54  
55 The primary outcome will be at least one of the following indicators of ovarian reserve function:(1)  
56 Anti-Müllerian hormone (AMH); (2) basal follicle-stimulating hormone (FSH), basal luteinizing  
57 hormone(LH), or the ratio of FSH/LH; (3) basal estradiol (E2); (4)serum inhibin-B; (5) antral follicle count  
58  
59  
60

(AFC). Secondary outcomes, if any, will be considered: (1) uterine receptivity (endometrial thickness, endometrial morphology, subendometrial blood flow, uterine spiral artery blood flow); (2) oviducts status; (3) menstruation status; (4) other female reproductive dysfunction diseases caused by COVID-19.

### **Exclusion criteria**

Studies will be excluded when: (1) the type of research is animal experiments, short surveys, and letters; (2) the female has no potential reproduction before menarche or after menopause; (3) only suspected cases, but not yet confirmed; (4) there are factors that could affect female fertility, such as serious endocrine diseases or overexposure to certain physical and chemical elements.

### **Information sources and search strategy**

FYL and QZ will search the following databases: Web of Science, PubMed, EMBASE, Cochrane Library, Ovid, EBSCO, WHO COVID-19 database, Chinese Biomedical Databases (CBM), China National Knowledge Internet (CNKI), Chinese Scientific and Technological Journal Database (VIP), and WangFang database. To maximise the search for relevant articles, the reference lists of selected studies and relevant reviews will be searched to identify additional papers not indexed in the databases searched. A systematic search strategy will be employed to identify articles from November 2019 to 2021/06/30. No language restriction will be applied. We will translate non-English articles and conduct update searches before manuscript submission to represent more target populations. The search term will combine medical subject headings (MeSH) with free text to search for concepts such as 'COVID-19' and 'fertility' and 'female'. Taking the search model developed for PubMed as an example to demonstrate the detailed search strategy, as shown in Table S1 of supplementary appendix 1. The search strategies will be adapted to other databases as appropriate and then be checked by another investigator.

### **Study selection**

Citations identified from the database searches will be imported into EndNote X9.1 software, and duplicate records will be removed by QY. After removing duplicates, QY and LXQ will independently screen titles and abstracts for this first level of filtering in duplicate. Potentially eligible full-text articles passing the first level of filtering will be independently screened. The studies will be cross-checked according to the pre-determined inclusion and exclusion criteria to further determine whether to include or not. The included and excluded studies will be examined by FYL and QZ to verify the reasons for each decision. We will contact the corresponding author for additional information when a study mentions outcomes of interest

1  
2  
3 without providing estimates. If discrepancies arise, we can reach a consensus by discussing or seek an  
4 adjudication from a third reviewer.  
5

### 6 7 **Data extraction** 8

9  
10 Two independent researchers (FYL and TW) will use a standardised Excel spreadsheet to extract data from  
11 the included studies independently. The outcome measures will be extracted as follows:  
12

13  
14 **study details:** title, primary author information, year of publication, journal, study design, country/region,  
15 fund source, sample size, age, period of study, duration of follow-up.  
16

17  
18 **population characteristics:** mean baseline age, body weight, height, mean baseline BMI, race, associated  
19 comorbidities.  
20

21  
22 **exposure:** diagnostic criteria for COVID-19 as an exposure, number of exposed subjects, duration of disease,  
23 details of COVID-19 severity, treatment characteristics.  
24

25  
26 **Comparators:** definition of unexposed subjects, number of comparators.  
27

### 28 29 **Outcomes:** 30

31  
32 The primary outcome is the proportion of females with decreased fertility, the association between  
33 COVID-19 and female fertility, or any risk estimate between COVID-19 and female fertility; since ACE2 is  
34 most widely expressed in the ovaries, particular attention should be paid to the decreased ovarian reserve  
35 function (mean AMH decline, elevation of basal FSH or LH, a disorder of the FSH/LH ratio). The secondary  
36 outcomes are uterine receptivity (endometrial thickness, endometrial morphology, subendometrial blood  
37 flow, uterine spiral artery blood flow), oviducts status, menstrual status. If there is missing information or  
38 ambiguous information, we will consider contacting the corresponding author by e-mail. The accuracy and  
39 consistency of all inputs will be cross-checked by two reviewers. Any disagreement will be settled by a third  
40 reviewer.  
41  
42  
43  
44  
45  
46  
47  
48  
49

### 50 51 **Quality and bias assessment** 52

53  
54 The included studies' methodological quality will be undertaken independently by two reviewers (TW and  
55 XYL) using appropriate tools. We will use the Newcastle-Ottawa Scale (NOS) for assessing the quality of  
56 cohort and case-control studies<sup>30</sup>. The NOS includes 8 items grouped into three domains: Selection of study  
57 population, comparability of study groups, and exposure (case-control studies) / outcome (cohort studies).  
58  
59  
60

1  
2  
3 Each study will be assigned a score of 0-9. NOS scores greater than 6 are relatively high quality, 5 to 6 are  
4 medium quality, and less than 5 are low quality. The Agency for Healthcare Research and Quality (AHRQ)  
5 methodology checklist will be applied to evaluate the quality of cross-sectional studies. Using the AHRQ  
6  
7 methodology checklist will be applied to evaluate the quality of cross-sectional studies. Using the AHRQ  
8  
9 checklist, each study will be judged on 11 items. The quality evaluation is as follows: high quality=8-11;  
10 moderate quality=4-7; poor quality=0-3. If any randomised controlled trials are included in this review, we  
11 will assess study quality using the Cochrane Collaboration's tool for risk of bias (ROB) assessment<sup>31</sup>. This  
12 tool includes 7 items grouped into 5 domains: reporting bias, selection bias, detection bias, performance bias,  
13 and attrition bias. The risk of bias will be classified as low, high or unclear risk according to the following  
14 items, such as random sequence generation, blinding of participants and researchers, allocation concealment,  
15 blinding of outcome assessment, completeness of outcome data, selective outcome reporting, and other bias.  
16 A summary risk of bias table in individual studies will be produced, with a short table to prove each of the  
17 judgments in the appendix. We will assess the quality of evidence and the strength of recommendations  
18 using the grading of recommendations assessment, development, and evaluation (GRADE) framework<sup>32</sup>.  
19 Possible discrepancies regarding bias appraisal will be solved by consensus or consulting a third reviewer.  
20  
21  
22  
23  
24  
25  
26  
27  
28  
29  
30

### 31 **Statistical analysis**

32  
33  
34  
35  
36  
37  
38  
39  
40  
41  
42  
43  
44  
45  
46  
47  
48  
49  
50  
51  
52  
53  
54  
55  
56  
57  
58  
59  
60  
XYL and TW will perform statistical analyses using RevMan 5.3. All statistical tests will be 2-tailed, and a  
*P* value of < 0.05 will be considered statistically significant.

**Assessment of heterogeneity** Heterogeneity will be tested for the results of multiple studies before merging  
the statistics. We will evaluate heterogeneity using the  $I^2$  index. If the  $I^2$  value < 50%, a non-substantial level  
of heterogeneity will be considered, and a fixed effect model will be applied to the meta-analysis. A random  
effects model will be used when  $I^2$  value > 50% indicates substantial heterogeneity. We will investigate  
sources of heterogeneity by using meta-regression analysis and subgroup analysis when substantial  
heterogeneity is detected.

**Data synthesis and analysis** We will synthesize our results both narratively and quantitatively.  
Non-quantitative outcomes, such as study characteristics (author, year, study design, country/region, sample  
size, etc.), will be reported descriptively. If considerable heterogeneity can not be reduced by some methods  
or the source of heterogeneity cannot be explored using subgroup analysis or regression analysis, we will  
also conduct a systematic review with descriptive analysis. If there are sufficient studies, we will consider

1  
2  
3 combining outcome data and performing a meta-analysis where appropriate to summarise the evidence for  
4 the association between COVID-19 and female fertility.  
5

### 6 7 **Publication bias**

8  
9  
10 Publication bias will be investigated using funnel plots, and the Egger's regression test will be applied to  
11 statistics when the funnel plots show asymmetry and there are 5 or more studies available<sup>33</sup>.  
12

### 13 14 **Subgroup and sensitivity analyses**

15  
16 Pre-planned subgroup analyses will be conducted to explore statistical heterogeneity If sufficient data is  
17 collected: (1) subgroups based on age (female patients aged 13–35 years and female patient aged 35–49  
18 years); (2) the time since fertility decline after COVID-19 infection; to this purpose, three subgroups will be  
19 identified: early ( $\leq 30$  days); middle ( $< 180$  days); late ( $\geq 1$  year); (3) Types of fertility decline: ovarian  
20 reserve function, uterine receptivity, oviducts status, menstrual status; (4) comorbidities; (5) COVID-19  
21 stage ( mild COVID-19 disease and severe COVID-19 disease). We will remove the included studies from  
22 the pooled analyses one by one and perform a sensitivity analysis to assess the robustness of the summary  
23 estimate.  
24  
25  
26  
27  
28  
29  
30  
31  
32

### 33 34 **Patient and Public Involvement**

35  
36 No patient involved.  
37

### 38 39 **Ethics and dissemination**

40  
41 Ethical approval is not required for this study, as it is a systematic review. The results will be disseminated  
42 by publication of the manuscript in a peer-reviewed journal and national and international presentations.  
43  
44

## 45 46 **SUMMARY**

47  
48 Given the overwhelming magnitude of the COVID-19 and its worldwide prevalence, It has been a  
49 significant public health issue. Direct and indirect evidence suggests that COVID-19 could impair female  
50 fertility, and attention has grown around fertility issues in these patients. Female fertility is broadly defined  
51 as their reproductive capacity and potential. However, there is no review to explore the association between  
52 COVID-19 and female fertility comprehensively. Therefore, we will conduct a systematic review and  
53 meta-analysis to present the overall view of the current literature and further improve research regarding  
54 their relationship as the literature has been updated. By pooling the available evidence on the link of female  
55  
56  
57  
58  
59  
60

1  
2  
3 fertility with COVID-19, promoting fertility preservation in these patients is of high clinical and public  
4 health significance.

5  
6 Sars-cov-2 may invade target cells by binding to ACE2, thereby affecting female fertility. ACE2, which is  
7 widely expressed in ovaries, uterus, vagina, and placenta, regulates the levels of angiotensin II (Ang II) and  
8 Ang-(1-7) to exert its physiological functions 8. ACE2, Ang II, and Ang-(1-7) could regulate follicular  
9 development and ovulation, regulate corpus luteum angiogenesis and degeneration, and affect endometrial  
10 tissue growth. Female fertility generally describes any form of ovarian-reserve function, uterine conditions,  
11 oviducts status, and menstrual status 8. Ovarian reserve is a key determinant of female fertility. Diminished  
12 ovarian reserve could affect fecundity by reducing egg quality<sup>34</sup>. In addition, ACE2 is highly expressed in  
13 the ovaries. Therefore, the ovarian reserve function should be the primary observation indicator for the  
14 impact of COVID-19 on female fertility. Routinely performed markers of ovarian reserve include a basal  
15 FSH or LH concentration, basal estradiol(E2), anti-Müllerian hormone (AMH), and assessment of antral  
16 follicle count (AFC)<sup>35,36</sup>. We will use endometrial receptivity, fallopian tube status, and menstrual conditions  
17 as secondary indicators. Furthermore, subgroup analyses and sensitivity analyses will be conducted to  
18 explore heterogeneity, such as age, follow-up time, the type of fertility decline, comorbidities, and severity  
19 of illness. It is generally accepted that fertility starts at (approximately) 13 years of age and is infertile at  
20 49<sup>37</sup>. With aging, the female fertility naturally declines. The decline in fertility in women aged 30-35 is slow  
21 and steady; however, the decline accelerates after the age of 35 due to decreases in the ovarian reserve and  
22 oocyte quality<sup>38</sup>. The subgroup analysis will assess the impact of COVID-19 on the fertility of women aged  
23 <35 years and >35 years.

24  
25 There are few large randomized studies in the literature on the impact of COVID-19 on female fertility. The  
26 majority of the relevant studies may come from cohort studies, cross-sectional studies, and case-control  
27 studies), and self-controlled case series designs. Nevertheless, we will conduct a systematic review and  
28 meta-analysis based on the existing evidence and constitute an update of literature to explore the immediate,  
29 medium, and long-term effects of COVID-19 on female fertility. It is of great significance to plan and take  
30 action to protect female fertility when there is a negative impact on fertility.

## 31 32 33 34 35 36 37 38 39 40 41 42 43 44 45 46 47 48 49 50 51 52 53 54 55 **REFERENCES**

- 1  
2  
3  
4  
5 1. World Health Organization, 2020. Coronavirus Disease 2019 (COVID-2019) Situation Report–49.  
6 Available at: <https://www.who.int/emergencies/diseases/novel-coronavirus-2019>. Accessed september 2,  
7 2020.  
8
- 9  
10  
11 2. Yang L, Liu S, Liu J, et al. COVID-19: immunopathogenesis and Immunotherapeutics. *Signal Transduct*  
12 *Target Ther.* 2020;5(1):128. Published 2020 Jul 25. doi:10.1038/s41392-020-00243-2.  
13
- 14  
15 3. Cao X. COVID-19: immunopathology and its implications for therapy. *Nat Rev Immunol.*  
16 2020;20(5):269-270. doi:10.1038/s41577-020-0308-3.  
17
- 18  
19 4. Xu XW, Wu XX, Jiang XG, et al. Clinical findings in a group of patients infected with the 2019 novel  
20 coronavirus (SARS-Cov-2) outside of Wuhan, China: retrospective case series. *BMJ.* 2020;368:m792.  
21 Published 2020 Feb 27. doi:10.1136/bmj.m792.  
22
- 23  
24 5. Gupta A, Madhavan MV, Sehgal K, et al. Extrapulmonary manifestations of COVID-19. *Nat Med.*  
25 2020;26(7):1017-1032. doi:10.1038/s41591-020-0968-3  
26
- 27  
28 6. Aitken RJ. COVID-19 and human spermatozoa - potential risks for infertility and sexual transmission  
29 [published online ahead of print, 2020 Jul 10]. *Andrology.* 2020;10.1111/andr.12859.  
30 doi:10.1111/andr.12859.  
31
- 32  
33 7. Fu J, Zhou B, Zhang L, et al. Expressions and significances of the angiotensin-converting enzyme 2 gene,  
34 the receptor of SARS-CoV-2 for COVID-19. *Mol Biol Rep.* 2020;47(6):4383-4392.  
35 doi:10.1007/s11033-020-05478-4.  
36
- 37  
38 8. Jing Y, Run-Qian L, Hao-Ran W, et al. Potential influence of COVID-19/ACE2 on the female  
39 reproductive system. *Mol Hum Reprod.* 2020;26(6):367-373. doi:10.1093/molehr/gaaa030.  
40
- 41  
42 9. Li R, Yin T, Fang F, et al. Potential risks of SARS-CoV-2 infection on reproductive health. *Reprod*  
43 *Biomed Online.* 2020;41(1):89-95. doi:10.1016/j.rbmo.2020.04.018.  
44
- 45  
46 10. Aassve A, Cavalli N, Mencarini L, Plach S, Livi Bacci M. The COVID-19 pandemic and human  
47 fertility. *Science.* 2020;369(6502):370-371. doi:10.1126/science.abc9520.  
48
- 49  
50 11. Li G, Tang D, Song B, et al. Impact of the COVID-19 Pandemic on Partner Relationships and Sexual  
51 and Reproductive Health: Cross-Sectional, Online Survey Study. *J Med Internet Res.* 2020;22(8):e20961.  
52  
53  
54  
55  
56  
57  
58  
59  
60

1  
2  
3  
4  
5 Published 2020 Aug 6. doi:10.2196/20961.  
6

7  
8 12. Schwartz DA, Graham AL. Potential Maternal and Infant Outcomes from (Wuhan) Coronavirus  
9 2019-nCoV Infecting Pregnant Women: Lessons from SARS, MERS, and Other Human Coronavirus  
10 Infections. *Viruses*. 2020;12(2):194. Published 2020 Feb 10. doi:10.3390/v12020194.  
11  
12

13  
14 13. Hsu AL, Guan M, Johannesen E, et al. Placental SARS-CoV-2 in a Pregnant Woman with Mild  
15 COVID-19 Disease [published online ahead of print, 2020 Aug 4]. *J Med Virol*. 2020;10.1002/jmv.26386.  
16  
17 doi:10.1002/jmv.26386.  
18

19  
20 14. Li W, Moore MJ, Vasilieva N, et al. Angiotensin-converting enzyme 2 is a functional receptor for the  
21 SARS coronavirus. *Nature*. 2003;426(6965):450-454. doi:10.1038/nature02145.  
22  
23

24  
25 15. Lukassen S, Chua RL, Trefzer T, et al. SARS-CoV-2 receptor ACE2 and TMPRSS2 are primarily  
26 expressed in bronchial transient secretory cells. *EMBO J*. 2020;39(10):e105114.  
27  
28 doi:10.15252/embj.20105114.  
29

30  
31 16. Hikmet F, Méar L, Edvinsson Å, Micke P, Uhlén M, Lindskog C. The protein expression profile of  
32 ACE2 in human tissues. *Mol Syst Biol*. 2020;16(7):e9610. doi:10.15252/msb.20209610.  
33  
34

35  
36 17. Zhou Y, Vedantham P, Lu K, et al. Protease inhibitors targeting coronavirus and filovirus  
37 entry. *Antiviral Res*. 2015;116:76-84. doi:10.1016/j.antiviral.2015.01.011.  
38  
39

40  
41 18. Matsuyama S, Nagata N, Shirato K, et al. Efficient activation of the severe acute respiratory syndrome  
42 coronavirus spike protein by the transmembrane protease TMPRSS2. *J Virol*. 2010;84(24):12658-12664.  
43  
44 doi:10.1128/JVI.01542-10.  
45

46  
47 19. Hoffmann M, Kleine-Weber H, Schroeder S, et al. SARS-CoV-2 Cell Entry Depends on ACE2 and  
48 TMPRSS2 and Is Blocked by a Clinically Proven Protease Inhibitor. *Cell*. 2020;181(2):271-280.e8.  
49  
50 doi:10.1016/j.cell.2020.02.052.  
51

52  
53 20. Lippi G, Lavie CJ, Henry BM, Sanchis-Gomar F. Do genetic polymorphisms in angiotensin converting  
54 enzyme 2 (ACE2) gene play a role in coronavirus disease 2019 (COVID-19)? [published online ahead of  
55 print, 2020 Jun 29]. *Clin Chem Lab Med*.  
56  
57 2020;/j/cclm.ahead-of-print/cclm-2020-0727/cclm-2020-0727.xml. doi:10.1515/cclm-2020-0727.  
58  
59  
60



21. [https://www.genecards.org/cgi-bin/carddisp.pl?gene=ACE2#protein\\_expression](https://www.genecards.org/cgi-bin/carddisp.pl?gene=ACE2#protein_expression).
22. Pereira VM, Reis FM, Santos RA, et al. Gonadotropin stimulation increases the expression of angiotensin-(1--7) and MAS receptor in the rat ovary. *Reprod Sci*. 2009 Dec;16(12):1165-74. doi: 10.1177/1933719109343309. Epub 2009 Aug 24. PMID: 19703990; PMCID: PMC7101720.
23. Mauvais-Jarvis F, Klein SL, Levin ER. Estradiol, Progesterone, Immunomodulation, and COVID-19 Outcomes. *Endocrinology*. 2020;161(9):bqaa127. doi:10.1210/endo/bqaa127.
24. Shamseer L, Moher D, Clarke M, et al. Preferred reporting items for systematic review and meta-analysis protocols (PRISMA-P) 2015: elaboration and explanation. *BMJ*. 2015;350:g7647. doi:10.1136/bmj.g7647.
25. Stroup DF, Berlin JA, Morton SC, et al. Meta-analysis of observational studies in epidemiology: a proposal for reporting. Meta-analysis Of Observational Studies in Epidemiology (MOOSE) group. *JAMA*. 2000;283(15):2008-2012. doi:10.1001/jama.283.15.2008.
26. Kumar S, Sharma A, Kshetrimayum C. Environmental & occupational exposure & female reproductive dysfunction. *Indian J Med Res*. 2019;150(6):532-545. doi:10.4103/ijmr.IJMR\_1652\_17.
27. van Dorp W, Haupt R, Anderson RA, et al. Reproductive Function and Outcomes in Female Survivors of Childhood, Adolescent, and Young Adult Cancer: A Review. *J Clin Oncol*. 2018 Jul 20;36(21):2169-2180. doi: 10.1200/JCO.2017.76.3441.
28. Korevaar TIM, M í n guez-Alarc ó n L, Messerlian C, et al. Association of Thyroid Function and Autoimmunity with Ovarian Reserve in Women Seeking Infertility Care. *Thyroid*. 2018 Oct;28(10):1349-1358. doi: 10.1089/thy.2017.0582.
29. Pascarella G, Strumia A, Piliago C, et al. COVID-19 diagnosis and management: a comprehensive review. *J Intern Med*. 2020;288(2):192-206. doi:10.1111/joim.13091.
30. Wells GA, Shea B, O'Connell D, et al. The Newcastle-Ottawa Scale (NOS) for Assessing the Quality of Nonrandomised Studies in Metaanalyses. Ottawa: Ottawa Hospital Research Institute; [http://www.ohri.ca/programs/clinical\\_epidemiology/oxford.asp](http://www.ohri.ca/programs/clinical_epidemiology/oxford.asp) (accessed 2 September 2020).
31. Higgins JP, Altman DG, Gøtzsche PC, et al. The Cochrane Collaboration's tool for assessing risk of bias

1  
2  
3  
4  
5 in randomised trials. *BMJ*. 2011;343:d5928. Published 2011 Oct 18. doi:10.1136/bmj.d5928.

6  
7  
8 32. Guyatt GH, Oxman AD, Vist GE, Kunz R, Falck-Ytter Y, Alonso-Coello P, Schünemann HJ; GRADE  
9 Working Group. GRADE: an emerging consensus on rating quality of evidence and strength of  
10 recommendations. *BMJ*. 2008 Apr 26;336(7650):924-6. doi: 10.1136/bmj.39489.470347.

11  
12  
13  
14 33. Egger M, Davey Smith G, Schneider M, Minder C. Bias in meta-analysis detected by a simple, graphical  
15 test. *BMJ*. 1997;315(7109):629-634. doi:10.1136/bmj.315.7109.629.

16  
17  
18  
19 34. Steiner AZ, Pritchard D, Stanczyk FZ, et al. Association Between Biomarkers of Ovarian Reserve and  
20 Infertility Among Older Women of Reproductive Age. *JAMA*. 2017;318(14):1367-1376.  
21 doi:10.1001/jama.2017.14588.

22  
23  
24  
25 35. Tal R, Seifer DB. Ovarian reserve testing: a user's guide. *Am J Obstet Gynecol*. 2017  
26 Aug;217(2):129-140. doi: 10.1016/j.ajog.2017.02.027.

27  
28  
29  
30 36. Johnson NP, Bagrie EM, Coomarasamy A, Bhattacharya S, Shelling AN, Jessop S, Farquhar C, Khan  
31 KS. Ovarian reserve tests for predicting fertility outcomes for assisted reproductive technology: the  
32 International Systematic Collaboration of Ovarian Reserve Evaluation protocol for a systematic review of  
33 ovarian reserve test accuracy. *BJOG*. 2006 Dec;113(12):1472-80. doi: 10.1111/j.1471-0528.2006.01068.x.  
34 PMID: 17176280.

35  
36  
37  
38 37. Jensen RE, Martins N, Parks MM. Public Perception of Female Fertility: Initial Fertility, Peak Fertility,  
39 and Age-Related Infertility Among U.S. Adults. *Arch Sex Behav*. 2018 Jul;47(5):1507-1516. doi:  
40 10.1007/s10508-018-1197-4.

41  
42  
43  
44 38. Ahmed TA, Ahmed SM, El-Gammal Z, Shouman S, Ahmed A, Mansour R, El-Badri N. Oocyte Aging:  
45 The Role of Cellular and Environmental Factors and Impact on Female Fertility. *Adv Exp Med Biol*.  
46 2020;1247:109-123. doi: 10.1007/5584\_2019\_456.

#### 47 48 49 50 **Abbreviations**

51  
52  
53 COVID-19 = coronavirus disease 2019, ACE2 = , SARS-CoV-2 = severe acute respiratory syndrome -CoV .  
54 Coronavirus 2 , WHO = World Health Organization, CBM = Chinese Biomedical Databases, CNKI = China  
55 National Knowledge Internet, VIP = Chinese Scientific and Technological Journal Database, 2019-nCoV =  
56 2019 Novel Coronavirus, PRISMA-P = Preferred Reporting Items for Systematic Reviews and  
57  
58  
59  
60

1  
2  
3  
4  
5 Meta-Analyses Protocol, MOOSE = meta-analysis of Observational Studies in Epidemiology, BAL =  
6 bronchoalveolar lavage, AMH = Anti-Müllerian hormone, FSH = follicle-stimulating hormone, LH =  
7 luteinizing hormone, E2 = estradiol, AFC = antral follicle count, BMI = Body Mass Index, NOS =  
8 Newcastle-Ottawa Quality Assessment Scale, AHRQ = Agency for Healthcare Research and Quality, ROB  
9 = Risk of Bias, GRADE = grading of recommendations assessment, development, and evaluation, Ang =  
10 angiotensin.  
11  
12  
13  
14  
15

### 16 17 **Contributors**

18  
19  
20 The study concept was developed by FYL. The manuscript of the protocol was drafted by FYL and critically  
21 revised by QZ and XYL. HL developed and provided feedback for all sections of the review protocol and  
22 approved the final manuscript. The search strategy was developed by FYL and QZ. Study selection will be  
23 performed by QY and LXQ. Data extraction and quality assessment will be performed by FYL and TW,  
24 with QCL as a third party in case of disagreements. All authors have approved the final version of the  
25 manuscript.  
26  
27  
28  
29  
30  
31

### 32 **Funding**

33  
34  
35 This study is financially supported by the Ministry of Science and Technology of the People's Republic of  
36 China.  
37  
38

### 39 **Competing interests**

40  
41 None declared.  
42  
43

### 44 **Patient consent and Ethics approval**

45  
46 Not required.  
47

### 48 **Provenance and peer review**

49  
50 Not commissioned; externally peer reviewed.  
51  
52  
53  
54  
55  
56  
57  
58  
59  
60

## Supplementary information

**Table S1: Searching strategy in PubMed**

| Theme     | Number | Searching terms                                                                                                                                                                                                                                                                                                                                                                                                                                                                                                                                                                                                                                                                                                                                                                                                                                                                                                                                                                                                                                                                                                                                                                                                                                                                                                                                                                                                                                                                                                                                                            |
|-----------|--------|----------------------------------------------------------------------------------------------------------------------------------------------------------------------------------------------------------------------------------------------------------------------------------------------------------------------------------------------------------------------------------------------------------------------------------------------------------------------------------------------------------------------------------------------------------------------------------------------------------------------------------------------------------------------------------------------------------------------------------------------------------------------------------------------------------------------------------------------------------------------------------------------------------------------------------------------------------------------------------------------------------------------------------------------------------------------------------------------------------------------------------------------------------------------------------------------------------------------------------------------------------------------------------------------------------------------------------------------------------------------------------------------------------------------------------------------------------------------------------------------------------------------------------------------------------------------------|
| exposures | #1     | "COVID-19" [Supplementary Concept, Mesh]                                                                                                                                                                                                                                                                                                                                                                                                                                                                                                                                                                                                                                                                                                                                                                                                                                                                                                                                                                                                                                                                                                                                                                                                                                                                                                                                                                                                                                                                                                                                   |
|           | #2     | "2019 novel coronavirus disease"[Title/Abstract] OR "COVID19"[Title/Abstract] OR "covid 19 pandemic"[Title/Abstract] OR "sars cov 2 infection"[Title/Abstract] OR "covid 19 virus disease"[Title/Abstract] OR "2019 novel coronavirus infection"[Title/Abstract] OR "2019 ncov infection"[Title/Abstract] OR "coronavirus disease 2019"[Title/Abstract] OR "coronavirus disease 19"[Title/Abstract] OR "2019 ncov disease"[Title/Abstract] OR "covid 19 virus infection"[Title/Abstract]                                                                                                                                                                                                                                                                                                                                                                                                                                                                                                                                                                                                                                                                                                                                                                                                                                                                                                                                                                                                                                                                                   |
| outcomes  | #3     | "fertility"[MeSH Terms]                                                                                                                                                                                                                                                                                                                                                                                                                                                                                                                                                                                                                                                                                                                                                                                                                                                                                                                                                                                                                                                                                                                                                                                                                                                                                                                                                                                                                                                                                                                                                    |
|           | #4     | "Fecundability"[Title/Abstract] OR "Fecundity"[Title/Abstract] OR "differential fertility"[Title/Abstract] OR "fertility differential"[Title/Abstract] OR "fertility determinants"[Title/Abstract] OR "determinant fertility"[Title/Abstract] OR "determinants fertility"[Title/Abstract] OR "fertility determinant"[Title/Abstract] OR "Subfecundity"[Title/Abstract] OR "fertility preferences"[Title/Abstract] OR "fertility preference"[Title/Abstract] OR "preference fertility"[Title/Abstract] OR "preferences fertility"[Title/Abstract] OR "fertility below replacement"[Title/Abstract] OR "below replacement fertility"[Title/Abstract] OR ("Marital"[All Fields] AND "Fertility"[Title/Abstract]) OR "fertility marital"[Title/Abstract] OR "natural fertility"[Title/Abstract] OR "fertility natural"[Title/Abstract] OR "world fertility survey"[Title/Abstract] OR (("fertiles"[All Fields] OR "Fertility"[MeSH Terms] OR "Fertility"[All Fields] OR "fertile"[All Fields] OR "fertilities"[All Fields]) AND "survey world"[Title/Abstract]) OR (("fertiles"[All Fields] OR "Fertility"[MeSH Terms] OR "Fertility"[All Fields] OR "fertile"[All Fields] OR "fertilities"[All Fields]) AND "surveys world"[Title/Abstract]) OR (("survey s"[All Fields] OR "surveyed"[All Fields] OR "surveying"[All Fields] OR "surveys and questionnaires"[MeSH Terms] OR ("Surveys"[All Fields] AND "questionnaires"[All Fields]) OR "surveys and questionnaires"[All Fields] OR "Survey"[All Fields] OR "Surveys"[All Fields]) AND "world fertility"[Title/Abstract]) OR |

|                   |           |                                                                                                                                                                                                                                                                                                                                                                                                                                                                  |
|-------------------|-----------|------------------------------------------------------------------------------------------------------------------------------------------------------------------------------------------------------------------------------------------------------------------------------------------------------------------------------------------------------------------------------------------------------------------------------------------------------------------|
|                   |           | <i>("survey s"[All Fields] OR "surveyed"[All Fields] OR "surveying"[All Fields] OR "surveys and questionnaires"[MeSH Terms] OR ("Surveys"[All Fields] AND "questionnaires"[All Fields]) OR "surveys and questionnaires"[All Fields] OR "Survey"[All Fields] OR "Surveys"[All Fields]) AND "world fertility"[Title/Abstract]) OR "world fertility surveys"[Title/Abstract] OR "fertility incentives"[Title/Abstract] OR "fertility incentive"[Title/Abstract]</i> |
| <b>population</b> | <b>#5</b> | <i>"female"[MeSH Terms]</i>                                                                                                                                                                                                                                                                                                                                                                                                                                      |
|                   | <b>#6</b> | <i>"Females"[Title/Abstract] OR "Female"[Title/Abstract]</i>                                                                                                                                                                                                                                                                                                                                                                                                     |
| <b>Search</b>     | <b>#7</b> | <i>(#1 OR #2) AND (#3 OR #4)AND(#5 OR #6)</i>                                                                                                                                                                                                                                                                                                                                                                                                                    |

**Table S2: Data extraction tool for the characteristics of the studies.**

| A     | B              | C                   | D       | E            | F              | G           | H           | I   | J                     | K   | L      | M      | N    | O             | P                                | Q                          | R                   | S        | T         | U                                                   | V                                                 | W                                 | X                   | Y               | Z                |  |
|-------|----------------|---------------------|---------|--------------|----------------|-------------|-------------|-----|-----------------------|-----|--------|--------|------|---------------|----------------------------------|----------------------------|---------------------|----------|-----------|-----------------------------------------------------|---------------------------------------------------|-----------------------------------|---------------------|-----------------|------------------|--|
| title | primary author | year of publication | journal | study design | country/region | fund source | sample size | age | duration of follow-up | age | weight | height | race | comorbidities | diagnostic criteria for COVID-19 | number of exposed subjects | duration of disease | severity | treatment | risk estimate between COVID-19 and female fertility | association between COVID-19 and female fertility | ovarian reserve function declines | uterine receptivity | oviducts status | menstrual status |  |
|       |                |                     |         |              |                |             |             |     |                       |     |        |        |      |               |                                  |                            |                     |          |           |                                                     |                                                   |                                   |                     |                 |                  |  |
|       |                |                     |         |              |                |             |             |     |                       |     |        |        |      |               |                                  |                            |                     |          |           |                                                     |                                                   |                                   |                     |                 |                  |  |

**PRISMA-P (Preferred Reporting Items for Systematic review and Meta-Analysis Protocols) 2015 checklist: recommended items to address in a systematic review protocol\***

| Section and topic                 | Item No | Checklist item                                                                                                                                                                                                                |   |                |
|-----------------------------------|---------|-------------------------------------------------------------------------------------------------------------------------------------------------------------------------------------------------------------------------------|---|----------------|
| <b>ADMINISTRATIVE INFORMATION</b> |         |                                                                                                                                                                                                                               |   |                |
| Title:                            |         |                                                                                                                                                                                                                               |   |                |
| Identification                    | 1a      | Identify the report as a protocol of a systematic review                                                                                                                                                                      | ✓ | P1(Title Page) |
| Update                            | 1b      | If the protocol is for an update of a previous systematic review, identify as such                                                                                                                                            | - | -              |
| Registration                      | 2       | If registered, provide the name of the registry (such as PROSPERO) and registration number                                                                                                                                    | ✓ | P2             |
| Authors:                          |         |                                                                                                                                                                                                                               |   |                |
| Contact                           | 3a      | Provide name, institutional affiliation, e-mail address of all protocol authors; provide physical mailing address of corresponding author                                                                                     | ✓ | P1(Title Page) |
| Contributions                     | 3b      | Describe contributions of protocol authors and identify the guarantor of the review                                                                                                                                           | ✓ | P14            |
| Amendments                        | 4       | If the protocol represents an amendment of a previously completed or published protocol, identify as such and list changes; otherwise, state plan for documenting important protocol amendments                               | - | -              |
| Support:                          |         |                                                                                                                                                                                                                               |   |                |
| Sources                           | 5a      | Indicate sources of financial or other support for the review                                                                                                                                                                 | ✓ | P14            |
| Sponsor                           | 5b      | Provide name for the review funder and/or sponsor                                                                                                                                                                             | ✓ | P14            |
| Role of sponsor or funder         | 5c      | Describe roles of funder(s), sponsor(s), and/or institution(s), if any, in developing the protocol                                                                                                                            | - | -              |
| <b>INTRODUCTION</b>               |         |                                                                                                                                                                                                                               |   |                |
| Rationale                         | 6       | Describe the rationale for the review in the context of what is already known                                                                                                                                                 | ✓ | P3-4           |
| Objectives                        | 7       | Provide an explicit statement of the question(s) the review will address with reference to participants, interventions, comparators, and outcomes (PICO)                                                                      | ✓ | P4             |
| <b>METHODS</b>                    |         |                                                                                                                                                                                                                               |   |                |
| Eligibility criteria              | 8       | Specify the study characteristics (such as PICO, study design, setting, time frame) and report characteristics (such as years considered, language, publication status) to be used as criteria for eligibility for the review | ✓ | P4-5           |
| Information sources               | 9       | Describe all intended information sources (such as electronic databases, contact with study authors, trial registers or other grey literature sources) with planned dates of coverage                                         | ✓ | P6             |

|                                    |     |                                                                                                                                                                                                                                                     |   |                          |
|------------------------------------|-----|-----------------------------------------------------------------------------------------------------------------------------------------------------------------------------------------------------------------------------------------------------|---|--------------------------|
| Search strategy                    | 10  | Present draft of search strategy to be used for at least one electronic database, including planned limits, such that it could be repeated                                                                                                          | ✓ | supplementary appendix 1 |
| <b>Study records:</b>              |     |                                                                                                                                                                                                                                                     |   |                          |
| Data management                    | 11a | Describe the mechanism(s) that will be used to manage records and data throughout the review                                                                                                                                                        | ✓ | P6                       |
| Selection process                  | 11b | State the process that will be used for selecting studies (such as two independent reviewers) through each phase of the review (that is, screening, eligibility and inclusion in meta-analysis)                                                     | ✓ | P6                       |
| Data collection process            | 11c | Describe planned method of extracting data from reports (such as piloting forms, done independently, in duplicate), any processes for obtaining and confirming data from investigators                                                              | ✓ | P6-7                     |
| Data items                         | 12  | List and define all variables for which data will be sought (such as PICO items, funding sources), any pre-planned data assumptions and simplifications                                                                                             | ✓ | P7                       |
| Outcomes and prioritization        | 13  | List and define all outcomes for which data will be sought, including prioritization of main and additional outcomes, with rationale                                                                                                                | ✓ | P7                       |
| Risk of bias in individual studies | 14  | Describe anticipated methods for assessing risk of bias of individual studies, including whether this will be done at the outcome or study level, or both; state how this information will be used in data synthesis                                | ✓ | P7-8                     |
| Data synthesis                     | 15a | Describe criteria under which study data will be quantitatively synthesised                                                                                                                                                                         | ✓ | P8-9                     |
|                                    | 15b | If data are appropriate for quantitative synthesis, describe planned summary measures, methods of handling data and methods of combining data from studies, including any planned exploration of consistency (such as I <sup>2</sup> , Kendall’s τ) | ✓ | P8-9                     |
|                                    | 15c | Describe any proposed additional analyses (such as sensitivity or subgroup analyses, meta-regression)                                                                                                                                               | ✓ | P8-9                     |
|                                    | 15d | If quantitative synthesis is not appropriate, describe the type of summary planned                                                                                                                                                                  | ✓ | P8-9                     |
| Meta-bias(es)                      | 16  | Specify any planned assessment of meta-bias(es) (such as publication bias across studies, selective reporting within studies)                                                                                                                       | ✓ | P8                       |
| Confidence in cumulative evidence  | 17  | Describe how the strength of the body of evidence will be assessed (such as GRADE)                                                                                                                                                                  | ✓ | P7-8                     |

**\* It is strongly recommended that this checklist be read in conjunction with the PRISMA-P Explanation and Elaboration (cite when available) for important clarification on the items. Amendments to a review protocol should be tracked and dated. The copyright for PRISMA-P (including checklist) is held by the PRISMA-P Group and is distributed under a Creative Commons Attribution Licence 4.0.**

*From: Shamseer L, Moher D, Clarke M, Ghersi D, Liberati A, Petticrew M, Shekelle P, Stewart L, PRISMA-P Group. Preferred reporting items for systematic review and meta-analysis protocols (PRISMA-P) 2015: elaboration and explanation. BMJ. 2015 Jan 2;349(jan02 1):g7647.*

# BMJ Open

## The impact of COVID-19 on female fertility: a systematic review and meta-analysis protocol

|                                 |                                                                                                                                                                                                                                                                                                                                                                                                                                                                                                                                                                                                                                                                                                                                                                                                                                                                                                                                                                                                                                                                                  |
|---------------------------------|----------------------------------------------------------------------------------------------------------------------------------------------------------------------------------------------------------------------------------------------------------------------------------------------------------------------------------------------------------------------------------------------------------------------------------------------------------------------------------------------------------------------------------------------------------------------------------------------------------------------------------------------------------------------------------------------------------------------------------------------------------------------------------------------------------------------------------------------------------------------------------------------------------------------------------------------------------------------------------------------------------------------------------------------------------------------------------|
| Journal:                        | <i>BMJ Open</i>                                                                                                                                                                                                                                                                                                                                                                                                                                                                                                                                                                                                                                                                                                                                                                                                                                                                                                                                                                                                                                                                  |
| Manuscript ID                   | bmjopen-2020-045524.R1                                                                                                                                                                                                                                                                                                                                                                                                                                                                                                                                                                                                                                                                                                                                                                                                                                                                                                                                                                                                                                                           |
| Article Type:                   | Protocol                                                                                                                                                                                                                                                                                                                                                                                                                                                                                                                                                                                                                                                                                                                                                                                                                                                                                                                                                                                                                                                                         |
| Date Submitted by the Author:   | 08-Jan-2021                                                                                                                                                                                                                                                                                                                                                                                                                                                                                                                                                                                                                                                                                                                                                                                                                                                                                                                                                                                                                                                                      |
| Complete List of Authors:       | Li, Fangyuan; Hospital of Chengdu University of Traditional Chinese Medicine; Chengdu University of Traditional Chinese Medicine, Lu, Hua; Chengdu University of Traditional Chinese Medicine Affiliated Deyang Hospital; Chengdu University of Traditional Chinese Medicine, Zhang, Qi ; Hospital of Chengdu University of Traditional Chinese Medicine; Chengdu University of Traditional Chinese Medicine, Li, Xinyun ; Hospital of Chengdu University of Traditional Chinese Medicine; Chengdu University of Traditional Chinese Medicine, wang, Tong; Hospital of Chengdu University of Traditional Chinese Medicine; Chengdu University of Traditional Chinese Medicine, Liu, Qianchen; Hospital of Chengdu University of Traditional Chinese Medicine<br>Yang, Qian; Hospital of Chengdu University of Traditional Chinese Medicine, ; Chengdu University of Traditional Chinese Medicine Affiliated Hospital<br>Qiang, Lingxia; Hospital of Chengdu University of Traditional Chinese Medicine, ; Chengdu University of Traditional Chinese Medicine Affiliated Hospital |
| <b>Primary Subject Heading</b>: | Epidemiology                                                                                                                                                                                                                                                                                                                                                                                                                                                                                                                                                                                                                                                                                                                                                                                                                                                                                                                                                                                                                                                                     |
| Secondary Subject Heading:      | Obstetrics and gynaecology, Reproductive medicine                                                                                                                                                                                                                                                                                                                                                                                                                                                                                                                                                                                                                                                                                                                                                                                                                                                                                                                                                                                                                                |
| Keywords:                       | COVID-19, GYNAECOLOGY, Epidemiology < INFECTIOUS DISEASES                                                                                                                                                                                                                                                                                                                                                                                                                                                                                                                                                                                                                                                                                                                                                                                                                                                                                                                                                                                                                        |
|                                 |                                                                                                                                                                                                                                                                                                                                                                                                                                                                                                                                                                                                                                                                                                                                                                                                                                                                                                                                                                                                                                                                                  |

SCHOLARONE™  
Manuscripts





I, the Submitting Author has the right to grant and does grant on behalf of all authors of the Work (as defined in the below author licence), an exclusive licence and/or a non-exclusive licence for contributions from authors who are: i) UK Crown employees; ii) where BMJ has agreed a CC-BY licence shall apply, and/or iii) in accordance with the terms applicable for US Federal Government officers or employees acting as part of their official duties; on a worldwide, perpetual, irrevocable, royalty-free basis to BMJ Publishing Group Ltd ("BMJ") its licensees and where the relevant Journal is co-owned by BMJ to the co-owners of the Journal, to publish the Work in this journal and any other BMJ products and to exploit all rights, as set out in our [licence](#).

The Submitting Author accepts and understands that any supply made under these terms is made by BMJ to the Submitting Author unless you are acting as an employee on behalf of your employer or a postgraduate student of an affiliated institution which is paying any applicable article publishing charge ("APC") for Open Access articles. Where the Submitting Author wishes to make the Work available on an Open Access basis (and intends to pay the relevant APC), the terms of reuse of such Open Access shall be governed by a Creative Commons licence – details of these licences and which [Creative Commons](#) licence will apply to this Work are set out in our licence referred to above.

Other than as permitted in any relevant BMJ Author's Self Archiving Policies, I confirm this Work has not been accepted for publication elsewhere, is not being considered for publication elsewhere and does not duplicate material already published. I confirm all authors consent to publication of this Work and authorise the granting of this licence.

1  
2  
3 The impact of COVID-19 on female fertility: a systematic review and meta-analysis protocol  
4  
5

6 Fangyuan Li,<sup>a,b</sup> Hua Lu,<sup>a,b,\*</sup> Qi Zhang,<sup>a,b</sup> Xinyun Li,<sup>a,b</sup> Tong Wang,<sup>a,b</sup> Qianchen Liu,<sup>b</sup>

8  
9 QianYang,<sup>a,b</sup> Lingxia Qiang<sup>a,b</sup>  
10

11 **Corresponding author:** Prof. Hua Lu  
12

13  
14 \*Hospital of Chengdu University of Traditional Chinese Medicine, NO.39 Shi-er-qiao Road, Chengdu  
15

16  
17 610075, Sichuan Province, P.R. China.  
18

19  
20 E-mail: lh18980880525@126.com  
21

22  
23 Tel: (086) 18980880525  
24

25  
26 **Author information**  
27

28 <sup>a</sup> College of Clinical Medicine, Chengdu University of Traditional Chinese Medicine, NO.37 Shi-er-qiao  
29 Road, Chengdu 610075, Sichuan Province, P.R. China;  
30

31  
32  
33 <sup>b</sup> Hospital of Chengdu University of Traditional Chinese Medicine, NO.39 Shi-er-qiao Road, Chengdu  
34 610075, Sichuan Province, P.R. China;  
35  
36

37  
38 **Contributor's email**  
39

40 Fangyuan Li, Email: lfy3348377873@126.com.  
41

42  
43 Qi Zhang, Email: zhangqi9212@163.com.  
44

45 Xinyun Li, Email:lix9405@outlook.com.  
46

47  
48 TongWang, Email:wangtongde0623@163.com.  
49

50  
51 Qianchen Liu, Email:vinalqc@126.com.  
52

53  
54 QianYang, Email:997650457@qq.com.  
55

56  
57 Lingxia Qiang, Email:1499293001@qq.com.  
58  
59  
60

1  
2  
3  
4  
5  
6  
7  
8  
9  
10  
11  
12  
13  
14  
15  
16  
17  
18  
19  
20  
21  
22  
23  
24  
25  
26  
27  
28  
29  
30  
31  
32  
33  
34  
35  
36  
37  
38  
39  
40  
41  
42  
43  
44  
45  
46  
47  
48  
49  
50  
51  
52  
53  
54  
55  
56  
57  
58  
59  
60

**Subject Terms:** 2019 novel coronavirus disease, COVID-19, female fertility.

**Word Count:** 3032 words

For peer review only

## ABSTRACT

### Introduction

The increased social and economic burden caused by the novel COVID-19 outbreak is gradually becoming a worrisome issue for the health sector. The novel coronavirus invades the target cell by binding to ACE2, which is widely expressed in the ovaries, uterus, vagina, and placenta. Significantly, the SARS-CoV-2 is said to interrupt female fertility through regulating ACE2. Thus, it is essential to investigate if the novel COVID-19 hampers female fertility, given that there is no systematic and comprehensive evidence on the association of COVID-19 with female fertility.

### Methods and analysis

We will systematically search cohort studies, cross-sectional studies, case-control studies, and self-controlled case series designs in the following databases: Web of Science, PubMed, EMBASE, Cochrane Library, Ovid, EBSCO, WHO COVID-19 database, CBM, CNKI, VIP, and WanFang database. Medical subject headings and free text terms for “COVID-19” AND “female” AND “fertility” will be performed. Eligibility criteria are as follows: population (female patients aged 13-49 years); exposure (infection with SARS-CoV-2); comparison (population without SARS-CoV-2 infections or latent SARS-CoV-2 infections); and outcome (female fertility, such as ovarian reserve function, uterine receptivity, oviducts status, and menstruation status). Article screening and data extraction will be undertaken independently by two reviewers, and discrepancies will be resolved through discussion. We will use the  $I^2$  statistics to assess the heterogeneity and perform a meta-analysis when sufficiently homogeneous studies are provided. Otherwise, a narrative synthesis will be performed. We will explore the potential sources of heterogeneity using subgroup analyses and meta-regression.

### Ethics and dissemination

Formal ethical approval is not required, and findings will be published in a peer-reviewed journal.

### PROSPERO registration number

CRD42020189856

**Keywords:** novel coronavirus, COVID-19, female fertility, systematic review

### Strengths and limitations of this study

The present systematic review will follow the Preferred Reporting Items for Systematic Reviews and Meta Analyses guidelines.

The present study has an established aim, stringent inclusion and exclusion criteria, and a precise quality evaluation and quantitative synthesis.

It will assess the evidence for differential impact of COVID-19 on reduced fertility risk in different population subgroups, for example, by different ages, the severity of disease through subgroup analysis.

Two reviewers will independently screen for eligibility, data extraction, with a third reviewer mediating when a disagreement arises, thus ensuring that reviewer bias is minimized.

The lack of uniformity in measures of fertility may yield significant heterogeneity.

## INTRODUCTION

The national and global spread of coronavirus disease 2019 (COVID-19) caused by severe acute respiratory syndrome coronavirus 2 (SARS-CoV-2), has made it one of the most severe public health threat. Globally, as of the 2nd of September 2020, there have been 25,602,665 confirmed cases of COVID-19, including 852,758 deaths, reported by the WHO<sup>1</sup>. SARS-CoV-2 infection disrupts normal immune responses<sup>2</sup>, leading to the local and systematic damage of tissues<sup>3</sup>. Local tissue damage primarily affects the lower respiratory tract and presents as pneumonia, including fever, cough, expectoration, and haemoptysis<sup>4</sup>. Extrapulmonary damage of COVID-19 includes acute kidney injury, hepatocellular injury, neurologic illnesses, myocardial dysfunction and arrhythmia, and gastrointestinal symptoms<sup>5</sup>.

Besides, sperm are also susceptible to viral attack<sup>6</sup> and SARS-CoV-2 infection may most likely to cause male infertility<sup>7</sup>. SARS-CoV-2 appears to have shown adverse effects on the reproductive system. Some studies have shown that SARS-CoV-2 might affect female fertility and disturb female reproductive functions<sup>8,9</sup>. Given the scale of the COVID-19 pandemic, there appears to be a potential decline in fertility<sup>10</sup>.

1  
2  
3 A study reported that many young adults have sexual and reproductive health problems due to COVID-19  
4 pandemic and related containment measures<sup>11</sup>. It has been reported that COVID-19 is usually accompanied  
5 by high levels of IL-6, IL-8, TNF- $\alpha$ , and other cytokines, which trigger a procoagulant state that is  
6 unfavorable to the development of blastocyst or fetus in a normal human uterus<sup>12</sup>. An epidemiological study  
7 demonstrated that coronaviruses could have adverse effects on fetuses and infants, including preterm  
8 delivery, intrauterine growth restriction, spontaneous abortion, and even death<sup>13</sup>. Moreover, studies have  
9 documented the presence of SARS-COV-2 across the placenta even in pregnant patients with mild  
10 COVID-19 disease, potentially leading to fetal growth restriction and other pregnancy complications<sup>14</sup>.  
11 Accumulating evidence now suggests that 2019-nCoV/ACE2 may interfere with the female reproductive  
12 functions, leading to menstrual disorder, infertility, and fetal distress<sup>8</sup>.  
13  
14

15  
16  
17  
18  
19  
20  
21  
22  
23 Angiotensin-converting enzyme 2 (ACE2) is a receptor for SARS-CoV<sup>15</sup>. SARS-CoV-2, as a subgenus  
24 Sarbecovirus of the genus Betacoronavirus, shares a 76% amino acid sequence homology with  
25 SARS-CoV<sup>16</sup>. The protein expression profile of ACE2 is also considered to be the host receptor of  
26 SARS-COV-2<sup>17</sup>. Thus SARS-CoV-2 can invade target host cells by using the ACE2 as the primary receptor  
27 binding site<sup>18-20</sup> and regulate the expression of ACE2 in host cells<sup>8</sup>. ACE2 expression has been assessed in  
28 various human organs, such as respiratory tracts, heart, kidney, ovary, uterus, testis, vagina and placenta,  
29 and gastrointestinal system<sup>8,21</sup>. Notably, ACE2 is highly expressed in the ovaries<sup>22</sup>. Published reports  
30 suggest that ACE2 is expressed in stromal cells, granulosa cells, and oocytes in immature rat ovaries<sup>23</sup>.  
31 ACE2 regulates follicular development and ovulation, regulates luteal angiogenesis and degeneration, and  
32 affects the regular changes of endometrial tissue and embryo development<sup>8</sup>. Significantly, ACE2 plays a  
33 regulatory role in reproduction<sup>7</sup>. Considering these factors, SARS-CoV-2 may interrupt female fertility by  
34 attacking ovarian tissue and granulosa cells or damaging endometrial epithelial cells<sup>9</sup>. Basigin (BSG) is also  
35 one of the most crucial receptors for COVID-19 that mediates its entry to host cells<sup>24</sup>. BSG is expressed not  
36 only in the uterus but also in the stroma and granulosa cells of the ovary<sup>24,25</sup>. BSG may play a role during  
37 follicle development, corpus luteum formation, and embryo implantation<sup>26</sup>. Besides, COVID-19, impairing  
38 the immune system might alter the function of the hypothalamic-pituitary-gonadal axis<sup>2,27</sup>. Sex steroids are  
39 potent immune modulators, different progesterone (P) and androgen concentrations are likely to influence  
40 the immune response and inflammatory outcomes of COVID-19<sup>27</sup>. Notwithstanding, the magnitude of the  
41 association between COVID-19 and female fertility remains unclear. With the overwhelming magnitude of  
42  
43  
44  
45  
46  
47  
48  
49  
50  
51  
52  
53  
54  
55  
56  
57  
58  
59  
60

1  
2  
3 COVID-19 and its worldwide prevalence, the associated health burden, and social and economic costs,  
4 might be a massive loss around the world.  
5  
6  
7

8 To our knowledge, there is no systematic review of the potential role of COVID-19 on female fertility.  
9 One of the most critical questions that remain to be answered is if or how COVID-19 affects female fertility.  
10 Hence, we decided to carry out a systematic review and meta-analysis to improve our understanding of the  
11 relationship between COVID-19 and female fertility and facilitate the development of prevention strategies  
12 at individual and population levels.  
13  
14  
15  
16  
17

## 18 **METHODS AND ANALYSIS**

19  
20  
21  
22 The study will be reported based on the Preferred Reporting Items for Systematic Reviews and  
23 Meta-Analyses Protocol (PRISMA-P) statement<sup>28</sup> and meta-analysis of Observational Studies in  
24 Epidemiology (MOOSE)<sup>29</sup>. This review's protocol is registered in the International Prospective Register of  
25 Systematic Reviews (PROSPERO), registration number (CRD42020189856).  
26  
27  
28  
29  
30

### 31 **Inclusion/exclusion criteria for study selection**

#### 32 **Study designs and characteristics**

33  
34 We will include observational studies (cohort studies, cross-sectional studies, and case-control studies), and  
35 self-controlled case series designs. These studies should also report the impact of COVID-19 on female  
36 fertility, including variations in menstrual situation, gonad function, ovarian reserve function, tubal patency,  
37 and endometrial receptivity. It is not restricted by language, publication status, geography, or medical  
38 conditions.  
39  
40  
41  
42  
43  
44  
45

#### 46 **Participants**

47  
48 Female patients in puberty and adulthood (13 years old  $\leq$  age  $\leq$  49 years old) with COVID-19; females  
49 were not excessively exposed to certain physical, biological, chemical, or environmental factors that affect  
50 female fertility, such as lead, cadmium, mercury, pesticides, benzene, toluene and ionizing radiation<sup>30</sup>; not  
51 have any gonadal injury that caused by high-dose alkylating agent chemotherapy and abdominal/pelvic  
52 radiotherapy<sup>31</sup>; and severe thyroid dysfunction and other diseases that affect female fertility will be  
53 excluded<sup>32</sup>.  
54  
55  
56  
57  
58  
59  
60

## Exposure/Interest

The exposure factor of interest is infection with SARS-CoV-2, primarily diagnosed by RT-PCR with a nasal swab, tracheal aspirate, or bronchoalveolar lavage (BAL) specimens<sup>33</sup>.

## Comparators

The comparator group will be the population without SARS-CoV-2 infections or with latent SARS-CoV-2 infections.

## Outcome measures

The primary outcome will be at least one of the following indicators of ovarian reserve function:(1) Anti-Müllerian hormone (AMH); (2) basal follicle-stimulating hormone (FSH), basal luteinizing hormone(LH), or the ratio of FSH/LH; (3) basal estradiol (E2); (4)serum inhibin-B; and (5) antral follicle count (AFC). Secondary outcomes, if any, will be considered: (1) uterine receptivity (endometrial thickness, endometrial morphology, subendometrial blood flow, uterine spiral artery blood flow); (2) oviducts status; (3) menstruation status; and (4) other female reproductive dysfunction diseases caused by COVID-19.

## Exclusion criteria

Studies will be excluded when: (1) the type of research are animal experiments, short surveys, and letters; (2) the female has no potential reproduction before menarche or after menopause; (3) only suspected cases, but not yet confirmed; (4) factors that could affect female fertility, such as severe endocrine diseases or overexposure to certain physical and chemical elements.

## Information sources and search strategy

FYL and QZ will search the following databases: Web of Science, PubMed, EMBASE, Cochrane Library, Ovid, EBSCO, WHO COVID-19 database, Chinese Biomedical Databases (CBM), China National Knowledge Internet (CNKI), Chinese Scientific and Technological Journal Database (VIP), and WanFang database. The reference lists of selected studies and relevant reviews will be searched to search for relevant articles and identify additional papers not indexed in the databases searched. A systematic search strategy will be employed to identify articles from November 2019 to 2021/06/30, with no language restriction. We will translate non-English articles and conduct update searches before manuscript submission to represent more target populations. The search term will combine medical subject headings (MeSH) with free text to search for concepts such as ‘COVID-19’ and ‘fertility’ and ‘female’. A detailed search strategy is described



1  
2  
3 in Table S1 of Supplementary Appendix 1, using PubMed as an example. The search strategies will be  
4 adapted to other databases as appropriate and then be checked by another investigator.  
5  
6

### 7 **Study selection**

8  
9 Citations identified from the database searches will be imported into EndNote X9.1 software, and QY will  
10 remove duplicate records. After removing duplicates, QY and LXQ will independently screen titles and  
11 abstracts for this first level of filtering duplicates. Potentially eligible full-text articles passing the first level  
12 of filtering will be independently screened. The studies will be cross-checked according to the  
13 pre-determined inclusion and exclusion criteria to determine their final inclusion. FYL and QZ will examine  
14 the included and excluded studies, and verify the reasons for each decision. We will contact the  
15 corresponding author for additional information when a study mentions impressive outcomes without  
16 providing estimates. If discrepancies arise, we can reach a consensus by discussing or seeking adjudication  
17 from a third reviewer.  
18  
19  
20  
21  
22  
23  
24  
25  
26

### 27 **Data extraction**

28  
29 Two independent researchers (FYL and TW) will use a standardized Excel spreadsheet to independently  
30 extract data from the included studies. The outcome measures will be extracted as follows:  
31  
32  
33  
34

35 **Study details:** Title, primary author information, year of publication, journal, study design, country/region,  
36 fund source, sample size, age, the period of study, and duration of follow-up.  
37  
38

39 **Population characteristics:** Mean baseline age, body weight, height, mean baseline BMI, race, and  
40 associated comorbidities.  
41  
42

43 **Exposure:** Diagnostic criteria for COVID-19 as an exposure, number of exposed subjects, duration of  
44 disease, details of COVID-19 severity, and treatment characteristics.  
45  
46  
47

48 **Comparators:** Definition of unexposed subjects, and the number of comparators.  
49  
50

### 51 **Outcomes:**

52  
53 The primary outcomes are the proportion of females with decreased fertility, the association between  
54 COVID-19 and female fertility, or any risk estimate between COVID-19 and female fertility; since ACE2 is  
55 most widely expressed in the ovaries, particular attention should be paid to the decreased ovarian reserve  
56 function (mean AMH decline, the elevation of basal FSH or LH, a disorder of the FSH/LH ratio). The  
57  
58  
59  
60

1  
2  
3 secondary outcomes are uterine receptivity (endometrial thickness, endometrial morphology, subendometrial  
4 blood flow, and uterine spiral artery blood flow), oviducts status, and menstrual status.  
5  
6

### 7 **Quality and bias assessment**

8  
9  
10 The included studies' methodological quality will be undertaken independently by two reviewers (TW and  
11 XYL) using appropriate tools. We will use the Newcastle-Ottawa Scale (NOS) for assessing the quality of  
12 cohort and case-control studies<sup>34</sup>. The NOS includes eight items grouped into three domains: selection of  
13 study population, comparability of study groups, and exposure (case-control studies) / outcome (cohort  
14 studies). Each study will be assigned a score of 0-9. NOS scores greater than 6 are relatively high quality, 5  
15 to 6 are medium quality, and less than 5 are low quality. The Agency for Healthcare Research and Quality  
16 (AHRQ) methodology checklist will be applied to evaluate the cross-sectional studies' quality. Using the  
17 AHRQ checklist, each study will be judged on 11 items. The quality evaluation is as follows: high  
18 quality=8-11; moderate quality=4-7; poor quality=0-3. A summary risk of bias table in individual studies  
19 will be produced, with a short table to prove each of the judgments in the appendix. We will assess the  
20 quality of evidence and the strength of recommendations using the grading of recommendations assessment,  
21 development, and evaluation (GRADE) framework<sup>35</sup>. Possible discrepancies regarding bias appraisal will be  
22 solved by consensus or consulting a third reviewer.  
23  
24  
25  
26  
27  
28  
29  
30  
31  
32  
33  
34  
35  
36

### 37 **Statistical analysis**

38  
39  
40 XYL and TW will perform statistical analyses using RevMan 5.3. All statistical tests will be 2-tailed, and a  
41 *P* value of < 0.05 will be considered statistically significant.  
42  
43

44  
45 **Assessment of heterogeneity:** Heterogeneity will be tested for results reported by multiple studies before  
46 merging the statistics. We will evaluate heterogeneity using the  $I^2$  index. If the  $I^2$  value is < 50%, a  
47 non-substantial level of heterogeneity will be considered, and a fixed effect model will be applied to  
48 the meta-analysis. A random effects model will be used when the  $I^2$  value is > 50%, indicating substantial  
49 heterogeneity. We will investigate sources of heterogeneity by using meta-regression analysis and subgroup  
50 analysis when substantial heterogeneity is detected.  
51  
52  
53  
54  
55  
56

57 **Data synthesis and analysis:** We will synthesize our results both narratively and quantitatively.  
58 Non-quantitative outcomes, such as study characteristics (author, year, study design, country/region, and  
59

1  
2  
3 sample size), will be reported descriptively. If considerable heterogeneity can not be reduced by some  
4 methods or the source of heterogeneity cannot be explored using subgroup analysis or regression analysis,  
5 we will also conduct a systematic review with descriptive analysis. If there are sufficient studies, we will  
6  
7 consider combining outcome data and performing a meta-analysis where appropriate to summarise the  
8  
9 evidence for the association between COVID-19 and female fertility.  
10  
11  
12

### 13 **Publication bias**

14  
15  
16 Publication bias will be investigated using funnel plots, and Egger's regression test will be applied to  
17 statistics when the funnel plots show asymmetry and there are five or more studies available<sup>36</sup>.  
18  
19  
20

### 21 **Subgroup and sensitivity analyses**

22  
23  
24 Pre-planned subgroup analyses will be conducted to explore statistical heterogeneity. If sufficient data is  
25 collected: (1) subgroups based on age (13–35 years and 35–49 years old); (2) the time since fertility decline  
26 after COVID-19 infection; to this purpose, three subgroups will be identified: early ( $\leq 30$  days); middle  
27 ( $< 180$  days); late ( $\geq 1$  year); (3) Types of fertility decline: ovarian reserve function, uterine receptivity,  
28 oviducts status, menstrual status; (4) comorbidities; and (5) COVID-19 stage ( mild COVID-19 disease and  
29 severe COVID-19 disease). We will remove the included studies from the pooled analyses one by one and  
30 perform a sensitivity analysis to assess the robustness of the summary estimate.  
31  
32  
33  
34  
35  
36  
37  
38

### 39 **Patient and Public Involvement**

40  
41 No patient involved.  
42  
43

### 44 **Ethics and dissemination**

45  
46 Ethical approval is not required for this study, as it is a systematic review. The results will be disseminated  
47 by the publication of the manuscript in a peer-reviewed journal and national and international presentations.  
48  
49  
50

## 51 **SUMMARY**

52  
53  
54 COVID-19 has been a significant public health issue, given its overwhelming magnitude and worldwide  
55 prevalence. Direct and indirect evidence suggests that COVID-19 could impair female fertility, which has  
56 gained much broader attention. Female fertility is broadly defined as their reproductive capacity and  
57  
58  
59  
60

1  
2  
3 potential. However, there are no comprehensive reviews to explore the association between COVID-19 and  
4 female fertility comprehensively. Hence, we will conduct a systematic review and meta-analysis to improve  
5 our understanding of the relationship between COVID-19 and female fertility and facilitate prevention  
6 strategies at individual and population levels. The study will also establish the current overall view of  
7 COVID-19 and female fertility, given the literature has been updated. By pooling the available evidence on  
8 the link of female fertility with COVID-19, promoting fertility preservation in these patients is of high  
9 clinical and public health significance.

10  
11 **SARS-CoV-2** may invade target cells by binding to ACE2, thereby affecting female fertility. ACE2, which  
12 is widely expressed in ovaries, uterus, vagina, and placenta, regulates the levels of angiotensin II (Ang II)  
13 and Ang-(1-7) to exert its physiological functions<sup>8</sup>. ACE2, Ang II, and Ang-(1-7) could regulate follicular  
14 development and ovulation, regulate corpus luteum angiogenesis and degeneration, and affect endometrial  
15 tissue growth. Ovarian reserve is a key determinant of female fertility. Diminished ovarian reserve could  
16 affect fecundity by reducing egg quality<sup>37</sup>. Besides, ACE2 is highly expressed in the ovaries. Therefore, the  
17 ovarian reserve function should be the primary observation indicator for the impact of COVID-19 on female  
18 fertility. Routinely performed markers of the ovarian reserve include a basal FSH or LH concentration, basal  
19 estradiol(E2), anti-Müllerian hormone (AMH), and assessment of antral follicle count (AFC)<sup>38,39</sup>. We will  
20 use endometrial receptivity, fallopian tube status, and menstrual conditions as secondary indicators.  
21 Furthermore, subgroup analyses and sensitivity analyses will be conducted to explore heterogeneity, such as  
22 age, follow-up time, the type of fertility decline, comorbidities, and severity of illness. It is generally  
23 accepted that fertility starts at (approximately) 13 years of age, and females begin infertile at age 49<sup>40</sup>. With  
24 aging, the female fertility naturally declines. The decline in fertility in women aged 30-35 is slow and  
25 steady; however, the decline accelerates after the age of 35 due to decreases in the ovarian reserve and  
26 oocyte quality<sup>41</sup>. The subgroup analysis will assess the impact of COVID-19 on the fertility of women aged  
27 <35 years and >35 years.

28  
29 The majority of the relevant studies may come from cohort studies, cross-sectional studies, case-control  
30 studies, and self-controlled case series designs. Nevertheless, we will conduct a systematic review and  
31 meta-analysis based on the existing evidence to explore the immediate, medium, and long-term effects of  
32 COVID-19 on female fertility. It is of great significance to plan and take action to protect female fertility  
33 when there is a negative impact on fertility.

## REFERENCES

1. World Health Organization, 2020. Coronavirus Disease 2019 (COVID-2019) Situation Report–49. Available at:<https://www.who.int/emergencies/diseases/novel-coronavirus-2019>. Accessed september 2, 2020.
2. Yang L, Liu S, Liu J, et al. COVID-19: immunopathogenesis and Immunotherapeutics. *Signal Transduct Target Ther*. 2020;5(1):128. Published 2020 Jul 25. doi:10.1038/s41392-020-00243-2.
3. Cao X. COVID-19: immunopathology and its implications for therapy. *Nat Rev Immunol*. 2020;20(5):269-270. doi:10.1038/s41577-020-0308-3.
4. Xu XW, Wu XX, Jiang XG, et al. Clinical findings in a group of patients infected with the 2019 novel coronavirus (SARS-Cov-2) outside of Wuhan, China: retrospective case series. *BMJ*. 2020;368:m792. Published 2020 Feb 27. doi:10.1136/bmj.m792.
5. Gupta A, Madhavan MV, Sehgal K, et al. Extrapulmonary manifestations of COVID-19. *Nat Med*. 2020;26(7):1017-1032. doi:10.1038/s41591-020-0968-3
6. Aitken RJ. COVID-19 and human spermatozoa - potential risks for infertility and sexual transmission [published online ahead of print, 2020 Jul 10]. *Andrology*. 2020;10.1111/andr.12859. doi:10.1111/andr.12859.
7. Fu J, Zhou B, Zhang L, et al. Expressions and significances of the angiotensin-converting enzyme 2 gene, the receptor of SARS-CoV-2 for COVID-19. *Mol Biol Rep*. 2020;47(6):4383-4392. doi:10.1007/s11033-020-05478-4.
8. Jing Y, Run-Qian L, Hao-Ran W, et al. Potential influence of COVID-19/ACE2 on the female reproductive system. *Mol Hum Reprod*. 2020;26(6):367-373. doi:10.1093/molehr/gaaa030.
9. Li R, Yin T, Fang F, et al. Potential risks of SARS-CoV-2 infection on reproductive health. *Reprod Biomed Online*. 2020;41(1):89-95. doi:10.1016/j.rbmo.2020.04.018.
10. Aassve A, Cavalli N, Mencarini L, Plach S, Livi Bacci M. The COVID-19 pandemic and human

fertility. *Science*. 2020;369(6502):370-371. doi:10.1126/science.abc9520.

11. Li G, Tang D, Song B, et al. Impact of the COVID-19 Pandemic on Partner Relationships and Sexual and Reproductive Health: Cross-Sectional, Online Survey Study. *J Med Internet Res*. 2020;22(8):e20961. Published 2020 Aug 6. doi:10.2196/20961.

12. Sills ES, Wood SH. An Experimental Model for Peri-conceptual COVID-19 Pregnancy Loss and Proposed Interventions to Optimize Outcomes. *Int J Mol Cell Med*. 2020 Summer;9(3):180-187. doi:10.22088/IJMCM.BUMS.9.3.180. Epub 2020 Nov 10. PMID: 33274180; PMCID: PMC7703664.

13. Schwartz DA, Graham AL. Potential Maternal and Infant Outcomes from (Wuhan) Coronavirus 2019-nCoV Infecting Pregnant Women: Lessons from SARS, MERS, and Other Human Coronavirus Infections. *Viruses*. 2020;12(2):194. Published 2020 Feb 10. doi:10.3390/v12020194.

14. Hsu AL, Guan M, Johannesen E, et al. Placental SARS-CoV-2 in a Pregnant Woman with Mild COVID-19 Disease [published online ahead of print, 2020 Aug 4]. *J Med Virol*. 2020;10.1002/jmv.26386. doi:10.1002/jmv.26386.

15. Li W, Moore MJ, Vasilieva N, et al. Angiotensin-converting enzyme 2 is a functional receptor for the SARS coronavirus. *Nature*. 2003;426(6965):450-454. doi:10.1038/nature02145.

16. Lukassen S, Chua RL, Trefzer T, et al. SARS-CoV-2 receptor ACE2 and TMPRSS2 are primarily expressed in bronchial transient secretory cells. *EMBO J*. 2020;39(10):e105114. doi:10.15252/embj.20105114.

17. Hikmet F, Méar L, Edvinsson Å, Micke P, Uhlén M, Lindskog C. The protein expression profile of ACE2 in human tissues. *Mol Syst Biol*. 2020;16(7):e9610. doi:10.15252/msb.20209610.

18. Zhou Y, Vedantham P, Lu K, et al. Protease inhibitors targeting coronavirus and filovirus entry. *Antiviral Res*. 2015;116:76-84. doi:10.1016/j.antiviral.2015.01.011.

19. Matsuyama S, Nagata N, Shirato K, et al. Efficient activation of the severe acute respiratory syndrome coronavirus spike protein by the transmembrane protease TMPRSS2. *J Virol*. 2010;84(24):12658-12664.

1  
2  
3  
4  
5 doi:10.1128/JVI.01542-10.  
6  
7

8 20. Hoffmann M, Kleine-Weber H, Schroeder S, et al. SARS-CoV-2 Cell Entry Depends on ACE2 and  
9 TMPRSS2 and Is Blocked by a Clinically Proven Protease Inhibitor. *Cell*. 2020;181(2):271-280.e8.  
10  
11 doi:10.1016/j.cell.2020.02.052.  
12  
13

14  
15 21. Lippi G, Lavie CJ, Henry BM, Sanchis-Gomar F. Do genetic polymorphisms in angiotensin converting  
16 enzyme 2 (ACE2) gene play a role in coronavirus disease 2019 (COVID-19)? [published online ahead of  
17 print, 2020 Jun 29]. *Clin Chem Lab Med*.  
18  
19 2020;/j/cclm.ahead-of-print/cclm-2020-0727/cclm-2020-0727.xml. doi:10.1515/cclm-2020-0727.  
20  
21  
22

23 22. [https://www.genecards.org/cgi-bin/carddisp.pl?gene=ACE2&keywords=ACE2#protein\\_expression](https://www.genecards.org/cgi-bin/carddisp.pl?gene=ACE2&keywords=ACE2#protein_expression).  
24  
25

26 23. Pereira VM, Reis FM, Santos RA, et al. Gonadotropin stimulation increases the expression of  
27 angiotensin-(1--7) and MAS receptor in the rat ovary. *Reprod Sci*. 2009 Dec;16(12):1165-74. doi:  
28 10.1177/1933719109343309. Epub 2009 Aug 24. PMID: 19703990; PMCID: PMC7101720.  
29  
30  
31

32  
33 24. Mahdian S, Shahhoseini M, Moini A. COVID-19 Mediated by Basigin Can Affect Male and Female  
34 Fertility. *Int J Fertil Steril*. 2020 Oct;14(3):262-263. doi: 10.22074/ijfs.2020.134702. Epub 2020 Oct 12.  
35  
36 PMID: 33098397; PMCID: PMC7604703.  
37  
38

39 25. Chen L, Bi J, Nakai M, Bunick D, Couse JF, Korach KS, Nowak RA. Expression of basigin in  
40 reproductive tissues of estrogen receptor- $\alpha$  or - $\beta$  null mice. *Reproduction*. 2010  
41  
42 Jun;139(6):1057-66. doi: 10.1530/REP-10-0069. Epub 2010 Apr 13. PMID: 20388736; PMCID:  
43  
44 PMC4778977.  
45  
46  
47

48 26. Chang H, Ni H, Ma XH, Xu LB, Kadomatsu K, Muramatsu T, Yang ZM. Basigin expression and  
49 regulation in mouse ovary during the sexual maturation and development of corpus luteum. *Mol Reprod*  
50  
51 Dev. 2004 Jun;68(2):135-41. doi: 10.1002/mrd.20060. PMID: 15095333.  
52  
53  
54

55 27. Mauvais-Jarvis F, Klein SL, Levin ER. Estradiol, Progesterone, Immunomodulation, and COVID-19  
56 Outcomes. *Endocrinology*. 2020;161(9):bqaa127. doi:10.1210/endo/bqaa127.  
57  
58

59 28. Shamseer L, Moher D, Clarke M, et al. Preferred reporting items for systematic review and  
60

- meta-analysis protocols (PRISMA-P) 2015: elaboration and explanation. *BMJ*. 2015;350:g7647. doi:10.1136/bmj.g7647.
29. Stroup DF, Berlin JA, Morton SC, et al. Meta-analysis of observational studies in epidemiology: a proposal for reporting. Meta-analysis Of Observational Studies in Epidemiology (MOOSE) group. *JAMA*. 2000;283(15):2008-2012. doi:10.1001/jama.283.15.2008.
30. Kumar S, Sharma A, Kshetrimayum C. Environmental & occupational exposure & female reproductive dysfunction. *Indian J Med Res*. 2019;150(6):532-545. doi:10.4103/ijmr.IJMR\_1652\_17.
31. van Dorp W, Haupt R, Anderson RA, et al. Reproductive Function and Outcomes in Female Survivors of Childhood, Adolescent, and Young Adult Cancer: A Review. *J Clin Oncol*. 2018 Jul 20;36(21):2169-2180. doi: 10.1200/JCO.2017.76.3441.
32. Korevaar TIM, M í nquez-Alarc ó n L, Messerlian C, et al. Association of Thyroid Function and Autoimmunity with Ovarian Reserve in Women Seeking Infertility Care. *Thyroid*. 2018 Oct;28(10):1349-1358. doi: 10.1089/thy.2017.0582.
33. Pascarella G, Strumia A, Piliago C, et al. COVID-19 diagnosis and management: a comprehensive review. *J Intern Med*. 2020;288(2):192-206. doi:10.1111/joim.13091.
34. Wells GA, Shea B, O'Connell D, et al. The Newcastle-Ottawa Scale (NOS) for Assessing the Quality of Nonrandomised Studies in Metaanalyses. Ottawa: Ottawa Hospital Research Institute; [http://www.ohri.ca/programs/clinical\\_epidemiology/oxford.asp](http://www.ohri.ca/programs/clinical_epidemiology/oxford.asp) (accessed 2 September 2020).
35. Guyatt GH, Oxman AD, Vist GE, Kunz R, Falck-Ytter Y, Alonso-Coello P, Schünemann HJ; GRADE Working Group. GRADE: an emerging consensus on rating quality of evidence and strength of recommendations. *BMJ*. 2008 Apr 26;336(7650):924-6. doi: 10.1136/bmj.39489.470347.
36. Egger M, Davey Smith G, Schneider M, Minder C. Bias in meta-analysis detected by a simple, graphical test. *BMJ*. 1997;315(7109):629-634. doi:10.1136/bmj.315.7109.629.
37. Steiner AZ, Pritchard D, Stanczyk FZ, et al. Association Between Biomarkers of Ovarian Reserve and Infertility Among Older Women of Reproductive Age. *JAMA*. 2017;318(14):1367-1376.



doi:10.1001/jama.2017.14588.

38. Tal R, Seifer DB. Ovarian reserve testing: a user's guide. *Am J Obstet Gynecol*. 2017 Aug;217(2):129-140. doi: 10.1016/j.ajog.2017.02.027.

39. Johnson NP, Bagrie EM, Coomarasamy A, Bhattacharya S, Shelling AN, Jessop S, Farquhar C, Khan KS. Ovarian reserve tests for predicting fertility outcomes for assisted reproductive technology: the International Systematic Collaboration of Ovarian Reserve Evaluation protocol for a systematic review of ovarian reserve test accuracy. *BJOG*. 2006 Dec;113(12):1472-80. doi: 10.1111/j.1471-0528.2006.01068.x. PMID: 17176280.

40. Jensen RE, Martins N, Parks MM. Public Perception of Female Fertility: Initial Fertility, Peak Fertility, and Age-Related Infertility Among U.S. Adults. *Arch Sex Behav*. 2018 Jul;47(5):1507-1516. doi: 10.1007/s10508-018-1197-4.

41. Ahmed TA, Ahmed SM, El-Gammal Z, Shouman S, Ahmed A, Mansour R, El-Badri N. Oocyte Aging: The Role of Cellular and Environmental Factors and Impact on Female Fertility. *Adv Exp Med Biol*. 2020;1247:109-123. doi: 10.1007/5584\_2019\_456.

## Abbreviations

COVID-19 = coronavirus disease 2019, ACE2 = angiotensin-converting enzyme 2, SARS-CoV-2 = severe acute respiratory syndrome Coronavirus 2, BSG = Basigin, WHO = World Health Organization, CBM = Chinese Biomedical Databases, CNKI = China National Knowledge Internet, VIP = Chinese Scientific and Technological Journal Database, 2019-nCoV = 2019 Novel Coronavirus, PRISMA-P = Preferred Reporting Items for Systematic Reviews and Meta-Analyses Protocol, MOOSE = meta-analysis of Observational Studies in Epidemiology, BAL = bronchoalveolar lavage, AMH = Anti-Müllerian hormone, FSH = follicle-stimulating hormone, LH = luteinizing hormone, E2 = estradiol, AFC = antral follicle count, BMI = Body Mass Index, NOS = Newcastle-Ottawa Quality Assessment Scale, AHRQ = Agency for Healthcare Research and Quality, ROB = Risk of Bias, GRADE = grading of recommendations assessment, development, and evaluation, Ang = angiotensin.

## Contributors

1  
2  
3  
4  
5 The study concept was developed by FYL. The manuscript of the protocol was drafted by FYL and critically  
6 revised by QZ and XYL. HL developed and provided feedback for all sections of the review protocol and  
7 approved the final manuscript. The search strategy was developed by FYL and QZ. Study selection will be  
8 performed by QY and LXQ. Data extraction and quality assessment will be performed by FYL and TW,  
9 with QCL as a third party in case of disagreements. All authors have approved the final version of the  
10 manuscript.  
11  
12  
13  
14  
15  
16

### 17 **Funding**

18  
19  
20 This study is financially supported by the Ministry of Science and Technology of the People's Republic of  
21 China (Grant number: 2018YFC1704305).  
22  
23  
24

### 25 **Competing interests**

26  
27 None declared.  
28

### 29 **Patient consent and Ethics approval**

30  
31 Not required.  
32  
33

### 34 **Provenance and peer review**

35  
36 Not commissioned; externally peer reviewed.  
37  
38  
39  
40  
41  
42  
43  
44  
45  
46  
47  
48  
49  
50  
51  
52  
53  
54  
55  
56  
57  
58  
59  
60

## Supplementary information

Table S1: Searching strategy in PubMed

| Theme     | Number | Searching terms                                                                                                                                                                                                                                                                                                                                                                                                                                                                                                                                                                                                                                                                                                                                                                                                                                                                                                                                                                                                                                                                                                                                                                                                                                                                                                                                                                                                                                                                                                                                                                                                                                                    |
|-----------|--------|--------------------------------------------------------------------------------------------------------------------------------------------------------------------------------------------------------------------------------------------------------------------------------------------------------------------------------------------------------------------------------------------------------------------------------------------------------------------------------------------------------------------------------------------------------------------------------------------------------------------------------------------------------------------------------------------------------------------------------------------------------------------------------------------------------------------------------------------------------------------------------------------------------------------------------------------------------------------------------------------------------------------------------------------------------------------------------------------------------------------------------------------------------------------------------------------------------------------------------------------------------------------------------------------------------------------------------------------------------------------------------------------------------------------------------------------------------------------------------------------------------------------------------------------------------------------------------------------------------------------------------------------------------------------|
| exposures | #1     | "COVID-19" [Supplementary Concept, Mesh]                                                                                                                                                                                                                                                                                                                                                                                                                                                                                                                                                                                                                                                                                                                                                                                                                                                                                                                                                                                                                                                                                                                                                                                                                                                                                                                                                                                                                                                                                                                                                                                                                           |
|           | #2     | "2019 novel coronavirus disease"[Title/Abstract] OR "COVID19"[Title/Abstract] OR "covid 19 pandemic"[Title/Abstract] OR "sars cov 2 infection"[Title/Abstract] OR "covid 19 virus disease"[Title/Abstract] OR "2019 novel coronavirus infection"[Title/Abstract] OR "2019 ncov infection"[Title/Abstract] OR "coronavirus disease 2019"[Title/Abstract] OR "coronavirus disease 19"[Title/Abstract] OR "2019 ncov disease"[Title/Abstract] OR "covid 19 virus infection"[Title/Abstract]                                                                                                                                                                                                                                                                                                                                                                                                                                                                                                                                                                                                                                                                                                                                                                                                                                                                                                                                                                                                                                                                                                                                                                           |
| outcomes  | #3     | "fertility"[MeSH Terms]                                                                                                                                                                                                                                                                                                                                                                                                                                                                                                                                                                                                                                                                                                                                                                                                                                                                                                                                                                                                                                                                                                                                                                                                                                                                                                                                                                                                                                                                                                                                                                                                                                            |
|           | #4     | "Fecundability"[Title/Abstract] OR "Fecundity"[Title/Abstract] OR "differential fertility"[Title/Abstract] OR "fertility differential"[Title/Abstract] OR "fertility determinants"[Title/Abstract] OR "determinant fertility"[Title/Abstract] OR "determinants fertility"[Title/Abstract] OR "fertility determinant"[Title/Abstract] OR "Subfecundity"[Title/Abstract] OR "fertility preferences"[Title/Abstract] OR "fertility preference"[Title/Abstract] OR "preference fertility"[Title/Abstract] OR "preferences fertility"[Title/Abstract] OR "fertility below replacement"[Title/Abstract] OR "below replacement fertility"[Title/Abstract] OR ("Marital"[All Fields] AND "Fertility"[Title/Abstract]) OR "fertility marital"[Title/Abstract] OR "natural fertility"[Title/Abstract] OR "fertility natural"[Title/Abstract] OR "world fertility survey"[Title/Abstract] OR (("fertiles"[All Fields] OR "Fertility"[MeSH Terms] OR "Fertility"[All Fields] OR "fertile"[All Fields] OR "fertilities"[All Fields]) AND "survey world"[Title/Abstract]) OR (("fertiles"[All Fields] OR "Fertility"[MeSH Terms] OR "Fertility"[All Fields] OR "fertile"[All Fields] OR "fertilities"[All Fields]) AND "surveys world"[Title/Abstract]) OR ("survey s"[All Fields] OR "surveyed"[All Fields] OR "surveying"[All Fields] OR "surveys and questionnaires"[MeSH Terms] OR ("Surveys"[All Fields] AND "questionnaires"[All Fields]) OR "surveys and questionnaires"[All Fields] OR "Survey"[All Fields] OR "Surveys"[All Fields]) AND "world fertility"[Title/Abstract]) OR ("survey s"[All Fields] OR "surveyed"[All Fields] OR "surveying"[All Fields] OR "surveys |

|                   |           |                                                                                                                                                                                                                                                                                                                                                                        |
|-------------------|-----------|------------------------------------------------------------------------------------------------------------------------------------------------------------------------------------------------------------------------------------------------------------------------------------------------------------------------------------------------------------------------|
|                   |           | <i>and questionnaires"[MeSH Terms] OR ("Surveys"[All Fields] AND "questionnaires"[All Fields]) OR "surveys and questionnaires"[All Fields] OR "Survey"[All Fields] OR "Surveys"[All Fields] AND "world fertility"[Title/Abstract]) OR "world fertility surveys"[Title/Abstract] OR "fertility incentives"[Title/Abstract] OR "fertility incentive"[Title/Abstract]</i> |
| <b>population</b> | <b>#5</b> | <i>"female"[MeSH Terms]</i>                                                                                                                                                                                                                                                                                                                                            |
|                   | <b>#6</b> | <i>"Females"[Title/Abstract] OR "Female"[Title/Abstract]</i>                                                                                                                                                                                                                                                                                                           |
| <b>Search</b>     | <b>#7</b> | <i>(#1 OR #2) AND (#3 OR #4)AND(#5 OR #6)</i>                                                                                                                                                                                                                                                                                                                          |

**Table S2: Data extraction tool for the characteristics of the studies.**

| A     | B              | C                   | D       | E            | F              | G           | H           | I   | J                     | K   | L      | M      | N    | O             | P                                | Q                          | R                   | S        | T         | U                                                   | V                                                 | W                                 | X                   | Y               | Z                |  |
|-------|----------------|---------------------|---------|--------------|----------------|-------------|-------------|-----|-----------------------|-----|--------|--------|------|---------------|----------------------------------|----------------------------|---------------------|----------|-----------|-----------------------------------------------------|---------------------------------------------------|-----------------------------------|---------------------|-----------------|------------------|--|
| title | primary author | year of publication | journal | study design | country/region | fund source | sample size | age | duration of follow-up | age | weight | height | race | comorbidities | diagnostic criteria for COVID-19 | number of exposed subjects | duration of disease | severity | treatment | risk estimate between COVID-19 and female fertility | association between COVID-19 and female fertility | ovarian reserve function declines | uterine receptivity | oviducts status | menstrual status |  |
|       |                |                     |         |              |                |             |             |     |                       |     |        |        |      |               |                                  |                            |                     |          |           |                                                     |                                                   |                                   |                     |                 |                  |  |
|       |                |                     |         |              |                |             |             |     |                       |     |        |        |      |               |                                  |                            |                     |          |           |                                                     |                                                   |                                   |                     |                 |                  |  |

**PRISMA-P (Preferred Reporting Items for Systematic review and Meta-Analysis Protocols) 2015 checklist: recommended items to address in a systematic review protocol\***

| Section and topic                 | Item No | Checklist item                                                                                                                                                                                                                |   |                |
|-----------------------------------|---------|-------------------------------------------------------------------------------------------------------------------------------------------------------------------------------------------------------------------------------|---|----------------|
| <b>ADMINISTRATIVE INFORMATION</b> |         |                                                                                                                                                                                                                               |   |                |
| Title:                            |         |                                                                                                                                                                                                                               |   |                |
| Identification                    | 1a      | Identify the report as a protocol of a systematic review                                                                                                                                                                      | ✓ | P1(Title Page) |
| Update                            | 1b      | If the protocol is for an update of a previous systematic review, identify as such                                                                                                                                            | - | -              |
| Registration                      | 2       | If registered, provide the name of the registry (such as PROSPERO) and registration number                                                                                                                                    | ✓ | P2             |
| Authors:                          |         |                                                                                                                                                                                                                               |   |                |
| Contact                           | 3a      | Provide name, institutional affiliation, e-mail address of all protocol authors; provide physical mailing address of corresponding author                                                                                     | ✓ | P1(Title Page) |
| Contributions                     | 3b      | Describe contributions of protocol authors and identify the guarantor of the review                                                                                                                                           | ✓ | P14/15         |
| Amendments                        | 4       | If the protocol represents an amendment of a previously completed or published protocol, identify as such and list changes; otherwise, state plan for documenting important protocol amendments                               | - | -              |
| Support:                          |         |                                                                                                                                                                                                                               |   |                |
| Sources                           | 5a      | Indicate sources of financial or other support for the review                                                                                                                                                                 | ✓ | P15            |
| Sponsor                           | 5b      | Provide name for the review funder and/or sponsor                                                                                                                                                                             | ✓ | P15            |
| Role of sponsor or funder         | 5c      | Describe roles of funder(s), sponsor(s), and/or institution(s), if any, in developing the protocol                                                                                                                            | - | -              |
| <b>INTRODUCTION</b>               |         |                                                                                                                                                                                                                               |   |                |
| Rationale                         | 6       | Describe the rationale for the review in the context of what is already known                                                                                                                                                 | ✓ | P3-4           |
| Objectives                        | 7       | Provide an explicit statement of the question(s) the review will address with reference to participants, interventions, comparators, and outcomes (PICO)                                                                      | ✓ | P4             |
| <b>METHODS</b>                    |         |                                                                                                                                                                                                                               |   |                |
| Eligibility criteria              | 8       | Specify the study characteristics (such as PICO, study design, setting, time frame) and report characteristics (such as years considered, language, publication status) to be used as criteria for eligibility for the review | ✓ | P5-6           |
| Information sources               | 9       | Describe all intended information sources (such as electronic databases, contact with study authors, trial registers or other grey literature sources) with planned dates of coverage                                         | ✓ | P6             |

|                                    |     |                                                                                                                                                                                                                                                  |   |                          |
|------------------------------------|-----|--------------------------------------------------------------------------------------------------------------------------------------------------------------------------------------------------------------------------------------------------|---|--------------------------|
| Search strategy                    | 10  | Present draft of search strategy to be used for at least one electronic database, including planned limits, such that it could be repeated                                                                                                       | ✓ | supplementary appendix 1 |
| Study records:                     |     |                                                                                                                                                                                                                                                  |   |                          |
| Data management                    | 11a | Describe the mechanism(s) that will be used to manage records and data throughout the review                                                                                                                                                     | ✓ | P6-7                     |
| Selection process                  | 11b | State the process that will be used for selecting studies (such as two independent reviewers) through each phase of the review (that is, screening, eligibility and inclusion in meta-analysis)                                                  | ✓ | P6-7                     |
| Data collection process            | 11c | Describe planned method of extracting data from reports (such as piloting forms, done independently, in duplicate), any processes for obtaining and confirming data from investigators                                                           | ✓ | P7                       |
| Data items                         | 12  | List and define all variables for which data will be sought (such as PICO items, funding sources), any pre-planned data assumptions and simplifications                                                                                          | ✓ | P7                       |
| Outcomes and prioritization        | 13  | List and define all outcomes for which data will be sought, including prioritization of main and additional outcomes, with rationale                                                                                                             | ✓ | P7                       |
| Risk of bias in individual studies | 14  | Describe anticipated methods for assessing risk of bias of individual studies, including whether this will be done at the outcome or study level, or both; state how this information will be used in data synthesis                             | ✓ | P7-8                     |
| Data synthesis                     | 15a | Describe criteria under which study data will be quantitatively synthesised                                                                                                                                                                      | ✓ | P8-9                     |
|                                    | 15b | If data are appropriate for quantitative synthesis, describe planned summary measures, methods of handling data and methods of combining data from studies, including any planned exploration of consistency (such as $I^2$ , Kendall's $\tau$ ) | ✓ | P8-9                     |
|                                    | 15c | Describe any proposed additional analyses (such as sensitivity or subgroup analyses, meta-regression)                                                                                                                                            | ✓ | P8-9                     |
|                                    | 15d | If quantitative synthesis is not appropriate, describe the type of summary planned                                                                                                                                                               | ✓ | P8-9                     |
| Meta-bias(es)                      | 16  | Specify any planned assessment of meta-bias(es) (such as publication bias across studies, selective reporting within studies)                                                                                                                    | ✓ | P8                       |
| Confidence in cumulative evidence  | 17  | Describe how the strength of the body of evidence will be assessed (such as GRADE)                                                                                                                                                               | ✓ | P8                       |

**\* It is strongly recommended that this checklist be read in conjunction with the PRISMA-P Explanation and Elaboration (cite when available) for important clarification on the items. Amendments to a review protocol should be tracked and dated. The copyright for PRISMA-P (including checklist) is held by the PRISMA-P Group and is distributed under a Creative Commons Attribution Licence 4.0.**

*From: Shamseer L, Moher D, Clarke M, Ghersi D, Liberati A, Petticrew M, Shekelle P, Stewart L, PRISMA-P Group. Preferred reporting items for systematic review and meta-analysis protocols (PRISMA-P) 2015: elaboration and explanation. BMJ. 2015 Jan 2;349(jan02 1):g7647.*
