# Supplementary material for: Impact of COVID-19 on female fertility: a systematic review and meta-analysis protocol
Source: HighWire-hosted journal article supplement (doi:10.1136/bmjopen-2020-045524), 2021-02-01
Supplement: bmjopen-2020-045524supp001_data_supplement.pdf [file bmjopen-2020-045524supp001_data_supplement.pdf]

## Supplementary information

Table S1: Searching strategy in PubMed

| Theme     | Number | Searching terms                                                                                                                                                                                                                                                                                                                                                                                                                                                                                                                                                                                                                                                                                                                                                                                                                                                                                                                                                                                                                                                                                                                                                                                                                                                                                                                                                                                                                                                                                                                                                                                                                                                    |
|-----------|--------|--------------------------------------------------------------------------------------------------------------------------------------------------------------------------------------------------------------------------------------------------------------------------------------------------------------------------------------------------------------------------------------------------------------------------------------------------------------------------------------------------------------------------------------------------------------------------------------------------------------------------------------------------------------------------------------------------------------------------------------------------------------------------------------------------------------------------------------------------------------------------------------------------------------------------------------------------------------------------------------------------------------------------------------------------------------------------------------------------------------------------------------------------------------------------------------------------------------------------------------------------------------------------------------------------------------------------------------------------------------------------------------------------------------------------------------------------------------------------------------------------------------------------------------------------------------------------------------------------------------------------------------------------------------------|
| exposures | #1     | "COVID-19" [Supplementary Concept, Mesh]                                                                                                                                                                                                                                                                                                                                                                                                                                                                                                                                                                                                                                                                                                                                                                                                                                                                                                                                                                                                                                                                                                                                                                                                                                                                                                                                                                                                                                                                                                                                                                                                                           |
|           | #2     | "2019 novel coronavirus disease"[Title/Abstract] OR "COVID19"[Title/Abstract] OR "covid 19 pandemic"[Title/Abstract] OR "sars cov 2 infection"[Title/Abstract] OR "covid 19 virus disease"[Title/Abstract] OR "2019 novel coronavirus infection"[Title/Abstract] OR "2019 ncov infection"[Title/Abstract] OR "coronavirus disease 2019"[Title/Abstract] OR "coronavirus disease 19"[Title/Abstract] OR "2019 ncov disease"[Title/Abstract] OR "covid 19 virus infection"[Title/Abstract]                                                                                                                                                                                                                                                                                                                                                                                                                                                                                                                                                                                                                                                                                                                                                                                                                                                                                                                                                                                                                                                                                                                                                                           |
| outcomes  | #3     | "fertility"[MeSH Terms]                                                                                                                                                                                                                                                                                                                                                                                                                                                                                                                                                                                                                                                                                                                                                                                                                                                                                                                                                                                                                                                                                                                                                                                                                                                                                                                                                                                                                                                                                                                                                                                                                                            |
|           | #4     | "Fecundability"[Title/Abstract] OR "Fecundity"[Title/Abstract] OR "differential fertility"[Title/Abstract] OR "fertility differential"[Title/Abstract] OR "fertility determinants"[Title/Abstract] OR "determinant fertility"[Title/Abstract] OR "determinants fertility"[Title/Abstract] OR "fertility determinant"[Title/Abstract] OR "Subfecundity"[Title/Abstract] OR "fertility preferences"[Title/Abstract] OR "fertility preference"[Title/Abstract] OR "preference fertility"[Title/Abstract] OR "preferences fertility"[Title/Abstract] OR "fertility below replacement"[Title/Abstract] OR "below replacement fertility"[Title/Abstract] OR ("Marital"[All Fields] AND "Fertility"[Title/Abstract]) OR "fertility marital"[Title/Abstract] OR "natural fertility"[Title/Abstract] OR "fertility natural"[Title/Abstract] OR "world fertility survey"[Title/Abstract] OR (("fertiles"[All Fields] OR "Fertility"[MeSH Terms] OR "Fertility"[All Fields] OR "fertile"[All Fields] OR "fertilities"[All Fields]) AND "survey world"[Title/Abstract]) OR (("fertiles"[All Fields] OR "Fertility"[MeSH Terms] OR "Fertility"[All Fields] OR "fertile"[All Fields] OR "fertilities"[All Fields]) AND "surveys world"[Title/Abstract]) OR ("survey s"[All Fields] OR "surveyed"[All Fields] OR "surveying"[All Fields] OR "surveys and questionnaires"[MeSH Terms] OR ("Surveys"[All Fields] AND "questionnaires"[All Fields]) OR "surveys and questionnaires"[All Fields] OR "Survey"[All Fields] OR "Surveys"[All Fields]) AND "world fertility"[Title/Abstract]) OR ("survey s"[All Fields] OR "surveyed"[All Fields] OR "surveying"[All Fields] OR "surveys |

|                   |           |                                                                                                                                                                                                                                                                                                                                                                        |
|-------------------|-----------|------------------------------------------------------------------------------------------------------------------------------------------------------------------------------------------------------------------------------------------------------------------------------------------------------------------------------------------------------------------------|
|                   |           | <i>and questionnaires"[MeSH Terms] OR ("Surveys"[All Fields] AND "questionnaires"[All Fields]) OR "surveys and questionnaires"[All Fields] OR "Survey"[All Fields] OR "Surveys"[All Fields] AND "world fertility"[Title/Abstract]) OR "world fertility surveys"[Title/Abstract] OR "fertility incentives"[Title/Abstract] OR "fertility incentive"[Title/Abstract]</i> |
| <b>population</b> | <b>#5</b> | <i>"female"[MeSH Terms]</i>                                                                                                                                                                                                                                                                                                                                            |
|                   | <b>#6</b> | <i>"Females"[Title/Abstract] OR "Female"[Title/Abstract]</i>                                                                                                                                                                                                                                                                                                           |
| <b>Search</b>     | <b>#7</b> | <i>(#1 OR #2) AND (#3 OR #4)AND(#5 OR #6)</i>                                                                                                                                                                                                                                                                                                                          |

**Table S2: Data extraction tool for the characteristics of the studies.**

| A     | B              | C                   | D       | E            | F              | G           | H           | I   | J                     | K   | L      | M      | N    | O                          | P                   | Q                          | R                   | S        | T         | U                                                   | V                                                 | W                                 | X                   | Y               | Z                |  |
|-------|----------------|---------------------|---------|--------------|----------------|-------------|-------------|-----|-----------------------|-----|--------|--------|------|----------------------------|---------------------|----------------------------|---------------------|----------|-----------|-----------------------------------------------------|---------------------------------------------------|-----------------------------------|---------------------|-----------------|------------------|--|
| title | primary author | year of publication | journal | study design | country/region | fund source | sample size | age | duration of follow-up | age | weight | height | race | comorbidities for COVID-19 | diagnostic criteria | number of exposed subjects | duration of disease | severity | treatment | risk estimate between COVID-19 and female fertility | association between COVID-19 and female fertility | ovarian reserve function declines | uterine receptivity | oviducts status | menstrual status |  |
|       |                |                     |         |              |                |             |             |     |                       |     |        |        |      |                            |                     |                            |                     |          |           |                                                     |                                                   |                                   |                     |                 |                  |  |
|       |                |                     |         |              |                |             |             |     |                       |     |        |        |      |                            |                     |                            |                     |          |           |                                                     |                                                   |                                   |                     |                 |                  |  |
